# Supplementary material for: Secondhand smoke exposure for different education levels: findings from a large, nationally representative survey in Turkey
Source: PubMed Central journal article supplement — BMJ Open. 2022 Feb 17;12(2):e057360. doi: 10.1136/bmjopen-2021-057360 (PMC8860053; doi:10.1136/bmjopen-2021-057360), 2022-02-17
Supplement: bmjopen-2021-057360.draft_revisions.pdf [file bmjopen-2021-057360.draft_revisions.pdf]

# BMJ Open

BMJ Open is committed to open peer review. As part of this commitment we make the peer review history of every article we publish publicly available.

When an article is published we post the peer reviewers' comments and the authors' responses online. We also post the versions of the paper that were used during peer review. These are the versions that the peer review comments apply to.

The versions of the paper that follow are the versions that were submitted during the peer review process. They are not the versions of record or the final published versions. They should not be cited or distributed as the published version of this manuscript.

BMJ Open is an open access journal and the full, final, typeset and author-corrected version of record of the manuscript is available on our site with no access controls, subscription charges or pay-per-view fees (<http://bmjopen.bmj.com>).

If you have any questions on BMJ Open's open peer review process please email [info.bmjopen@bmj.com](mailto:info.bmjopen@bmj.com)

# BMJ Open

## Factors associated with secondhand smoke exposure for different education levels in Turkey: a cross-sectional study

|                               |                                                                                                                                                                                                                                 |
|-------------------------------|---------------------------------------------------------------------------------------------------------------------------------------------------------------------------------------------------------------------------------|
| Journal:                      | <i>BMJ Open</i>                                                                                                                                                                                                                 |
| Manuscript ID                 | bmjopen-2021-057360                                                                                                                                                                                                             |
| Article Type:                 | Original research                                                                                                                                                                                                               |
| Date Submitted by the Author: | 13-Sep-2021                                                                                                                                                                                                                     |
| Complete List of Authors:     | Alkan, Ömer; Ataturk University, Department of Econometrics, Faculty of Economics and Administrative Sciences<br>Ünver, Şeyda; Ataturk University, Department of Econometrics, Faculty of Economics and Administrative Sciences |
| Keywords:                     | Health informatics < BIOTECHNOLOGY & BIOINFORMATICS, PUBLIC HEALTH, STATISTICS & RESEARCH METHODS                                                                                                                               |
|                               |                                                                                                                                                                                                                                 |

SCHOLARONE™  
Manuscripts

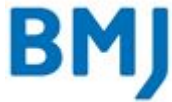

I, the Submitting Author has the right to grant and does grant on behalf of all authors of the Work (as defined in the below author licence), an exclusive licence and/or a non-exclusive licence for contributions from authors who are: i) UK Crown employees; ii) where BMJ has agreed a CC-BY licence shall apply, and/or iii) in accordance with the terms applicable for US Federal Government officers or employees acting as part of their official duties; on a worldwide, perpetual, irrevocable, royalty-free basis to BMJ Publishing Group Ltd ("BMJ") its licensees and where the relevant Journal is co-owned by BMJ to the co-owners of the Journal, to publish the Work in this journal and any other BMJ products and to exploit all rights, as set out in our [licence](#).

The Submitting Author accepts and understands that any supply made under these terms is made by BMJ to the Submitting Author unless you are acting as an employee on behalf of your employer or a postgraduate student of an affiliated institution which is paying any applicable article publishing charge ("APC") for Open Access articles. Where the Submitting Author wishes to make the Work available on an Open Access basis (and intends to pay the relevant APC), the terms of reuse of such Open Access shall be governed by a Creative Commons licence – details of these licences and which [Creative Commons](#) licence will apply to this Work are set out in our licence referred to above.

Other than as permitted in any relevant BMJ Author's Self Archiving Policies, I confirm this Work has not been accepted for publication elsewhere, is not being considered for publication elsewhere and does not duplicate material already published. I confirm all authors consent to publication of this Work and authorise the granting of this licence.

1  
2  
3  
4 **Factors associated with secondhand smoke exposure for different education levels in**  
5  
6 **Turkey: a cross-sectional study**  
7

8  
9 **ÖMER ALKAN\*** : Associate professor, Department of Econometrics, Faculty of Economics  
10 and Administrative Sciences, Ataturk University, 2nd Floor, No: 222, Yakutiye/Erzurum,  
11 Turkey, E-mail address: oalkan@atauni.edu.tr, Gsm: +09 0506 264 62 64, ORCID ID: 0000-  
12  
13  
14  
15  
16 0002-3814-3539  
17

18  
19 **ŞEYDA ÜNVER:** Research assistant, Department of Econometrics, Faculty of Economics  
20 and Administrative Sciences, Ataturk University, Yakutiye/Erzurum, Turkey, E-mail address:  
21 seyda.unver@atauni.edu.tr, ORCID ID: 0000-0002-2310-4545  
22  
23  
24  
25  
26  
27  
28  
29  
30  
31  
32  
33  
34  
35  
36  
37  
38  
39  
40  
41  
42  
43  
44  
45  
46  
47  
48  
49  
50  
51  
52  
53  
54  
55  
56  
57

---

58  
59 \* Corresponding author. Department of Econometrics, Faculty of Economics and Administrative Sciences,  
60 Ataturk University, Erzurum, TURKEY. e-mail adress: oalkan@atauni.edu.tr

## Abstract

**Objectives:** The aim of this study is to determine the factors associated with individuals' exposure to tobacco smoke according to their education level in Turkey.

**Design:** A cross-sectional observational design.

**Participants:** Data of 17,084 individuals aged 15 and over who participated in the Turkey Health Survey were used.

**Settings:** Participants were recruited from individuals aged 15 and over in Turkey.

**Methods:** Binary logistic regression analysis was used to determine the factors associated with individuals' exposure to tobacco smoke.

**Primary and secondary outcome measures:** It was found that the variables of age, gender, marital status, general health status, employment status, receipt of psycho-social support and tobacco use were correlated with exposure to tobacco smoke.

**Results:** In the study, it was determined that the exposure to tobacco smoke by the individual who are illiterate/unschooled was 32.61%, by the primary school graduates it was 34.32%, by the primary education graduates it was 41.75%, by the high school graduates it was 41.04% and by the university graduates it was 40.34%.

**Conclusion:** As a result of the study, it is emphasized that men, young individuals, individuals with moderate and very good general health status, using tobacco, who do not work and receive psycho-social support should be targeted. In addition, appropriate strategies should be developed to reduce SHS exposure by considering the public health strategies to raise awareness of the adverse health effects of SHS exposure and the determinants of exposure to tobacco according to the study.

**Keywords:** health informatics, public health, statistics & research methods

### Strengths and limitations of this study

- As far as we know, this is the first known study in Turkey to determine the factors associated with exposure to tobacco smoke according to the education level of individuals.

1  
2  
3 - It is emphasized that men, young individuals, individuals with moderate and very good general  
4 health status, using tobacco, who are unemployed and receive psycho-social support should be  
5 targeted.  
6  
7

8  
9 - The data in the study are secondary data. The variables required for statistical analysis consist  
10 of the variables existing in the data set.  
11  
12

13  
14 -The data obtained in the study are the own answers of the individuals. Therefore, the data  
15 obtained in this data collection method may be biased.  
16  
17

### 18 **Acknowledgements**

19  
20 The authors would like to thank the Turkish Statistical Institute for the data. The views and  
21 opinions expressed in this manuscript are those of the authors only and do not necessarily  
22 represent the views, official policy, or position of the Turkish Statistical Institute.  
23  
24  
25

### 26 **Ethics approval**

27  
28 This study was accomplished by using data of the survey titled Turkey Health Survey conducted  
29 by Turkey Statistical Institute. Therefore, ethical approval was not required for this study. We  
30 used secondary data for this study. In order to use the micro dataset from the Turkey Health  
31 Survey, the official permission was obtained from the Turkish Statistical Institute. In addition,  
32 a "Letter of Undertaking" was given to the Turkish Statistical Institute for the use of the data  
33 subjected to the study.  
34  
35  
36  
37  
38  
39

40  
41 **Patient and public involvement:** Patients and/or the public were not involved in the design,  
42 or conduct, or reporting, or dissemination plans of this research.  
43  
44

45 **Patient consent for publication:** Not required  
46  
47

### 48 **Consent for publication**

49  
50 Not applicable.  
51  
52

### 53 **Data availability statement**

54  
55 The data underlying this study is subject to third-party restrictions by the Turkey Statistical  
56 Institute. Data are available from the Turkish Statistical Institute (bilgi@tuik.gov.tr) for  
57  
58  
59  
60

1  
2  
3 researchers who meet the criteria for access to confidential data. The authors of the study did  
4 not receive any special privileges in accessing the data.  
5  
6

### 7 **Competing interests**

8  
9  
10 The authors have no competing interests to report. Additionally, the authors had full access to  
11 all of the data in the study and take responsibility for the integrity of the data and the accuracy  
12 of the data analysis.  
13  
14

### 15 **Funding**

16  
17 This research did not receive any specific grant from funding agencies in the public,  
18 commercial, or not-for-profit sectors.  
19  
20  
21  
22

### 23 **Author Contributions**

24  
25  
26 ÖA conceived and led the design and development of the study proposal. ÖA and ŞÜ supervised  
27 data collection, led the data analysis and drafting the manuscript. ŞÜ made substantial  
28 contributions to the conceptualization and design of the study, data interpretations and writing  
29 the manuscript. All authors read and approved the final version of the manuscript.  
30  
31  
32  
33  
34  
35  
36  
37  
38  
39  
40  
41  
42  
43  
44  
45  
46  
47  
48  
49  
50  
51  
52  
53  
54  
55  
56  
57  
58  
59  
60

## INTRODUCTION

Today, public health is considered as one of the most important indicators of the quality of life. Especially in recent years, public health has become one of the main issues laid stress on in all countries [1]. Tobacco use, a global problem, is the number one preventable cause of death worldwide and 6 million people die every year due to tobacco use [2]. The harmful impact of tobacco use is not only limited to smokers, but also include those exposed to second-hand smoke (SHS) [3].

SHS, the side stream smoke released into the air by a lit up tobacco product (cigarette, pipe or cigar), is a mixture of smoke from the product's filter and mainstream smoke that is breathed back into the air by an active smoker [4]. SHS contains more than 7000 chemicals, of which about 70 are known [5]. Indoor SHS concentration depends on the number of tobacco products smoked over a certain period of time, the volume of the room, the ventilation rate, and other processes that can remove contaminants [6].

Exposure to SHS creates significant health problems that threaten human health around the world. Exposure to SHS ranks third among the causes of preventable death worldwide [7]. Chronic exposure to SHS is at least 80-90% as harmful as chronic active smoking on an average [8]. More than 880,000 people die worldwide each year due to exposure to SHS [9]. Individuals exposed to SHS experience a 20% to 30% increase in cardiovascular disease compared to individuals not exposed to it at all [10]. Moreover, a similar increase in lung cancer was reported among individuals exposed to SHS compared to those not exposed to it as a result of a research [3]. Exposure to SHS also affects children. Children exposed to SHS are at increased risk for acute respiratory infections, auditory dysfunction and exacerbation of asthma [11, 12]. Therefore, exposure to SHS not only causes serious illness, but also creates an economic and social burden [13].

Controlling the prevalence of tobacco products and SHS is an important global public health challenge. Comprehensive smoke-free legislation is required under Article 8 of the Framework Convention on Tobacco Control (FCTC) of World Health Organization (WHO) to eliminate tobacco use in entire indoor public spaces, including workplaces [14]. In 2007, a revision was made on the Article 8 of the FCTC. Based on findings of potential health hazards, parties to FCTC have recommended smoking ban outdoors or in semi-open areas where appropriate. Turkey ratified the FCTC in 2004 [15]. In order to establish a smoke-free Turkey for protecting



1  
2  
3 passive smokers, on May 19, 2008, it was aimed to ban cigarette consumption in entire indoor  
4 areas (except restaurants, bars and cafes) and the “Smoke-Free Air Zone” campaign was  
5 launched [16]. On July 19, 2009, with the inclusion of restaurants, coffee houses, bars and cafes  
6 to the scope of the ban, it was ensured that entire indoor areas in Turkey are smoke-free. The  
7 frequency of both active and passive smoking has been positively affected through the  
8 prevention of smoking indoors. There was a significant decrease in the frequency of second-  
9 hand smoke in all indoor public areas, and the most significant decrease was observed in  
10 restaurants (55.9% in 2008, 12.9% in 2012). Although it is not within the scope of the law, there  
11 has been a serious decrease in the degree of second-hand smoke among the households.  
12 Moreover, as of 19 July 2009, Turkey has ranked the sixth country in the world and the third in  
13 Europe after Bermuda, New Zealand, Uruguay, England and Ireland, in terms of having the  
14 most comprehensive law on tobacco control according to WHO data [17].

15  
16  
17  
18  
19  
20  
21  
22  
23  
24  
25 Active smoking is a voluntary behavior; however, exposure to SHS occurs passively and can  
26 also affect nonsmokers. Therefore, in order to address SHS exposure properly, it is important  
27 to reveal the factors causing that exposure [13]. While the demographic, socioeconomic and  
28 psychosocial determinants of tobacco use have been extensively researched in the literature,  
29 studies focusing on SCC determinants are limited [13, 18, 19].

30  
31  
32  
33  
34  
35  
36  
37  
38  
39  
40  
41  
42  
43  
44  
45  
46  
47  
48  
49  
50  
51  
52  
53  
54  
55  
56  
57  
58  
59  
60  
In Turkey, little is known about the exposure of individuals with different education levels to  
tobacco smoke in Turkey. As far as we know, this is the first known study in Turkey to  
determine the factors associated with exposure to tobacco smoke according to the education  
level of individuals. The following constitutes the research problems of this study; Does the  
exposure to smoke among the individuals differentiate according to their educational level?, Is  
there a relationship between the demographic characteristics of individuals and their exposure  
to tobacco smoke?, and Are the factors associated with the exposure of tobacco smoke by the  
individuals having different educational levels the same?

## **METHODS**

### **Data**

In this study, survey data obtained from the Turkey Health Survey conducted by the Turkish  
Statistical Institute in 2019 were used. Turkey Health Survey was conducted with the aim of  
closing the information gap in the current structure by obtaining information about the health  
indicator, constituting a significant share among the development indicators showing the

1  
2  
3 development levels of the countries. The research is important in terms of being the first study  
4 reflecting the overall situation in the country, as well as enabling the international comparisons  
5 while shedding a light on the national requirements [20].  
6  
7

8  
9 The stratified two-stage cluster sampling method was used to obtain the data. The first stage  
10 sampling unit is randomly selected blocks from clusters (blocks) containing an average of 100  
11 house addresses proportional to the size; the second stage sampling unit is the household  
12 addresses selected randomly from each selected cluster. The research was designed to give a  
13 total estimate for Turkey. The total sample volume has been determined as 9470 household  
14 addresses due to the design of the study [20].  
15  
16  
17  
18  
19

### 20 **Outcome Variables**

21  
22 The dependent variable of the study is exposure to tobacco smoke by the individuals according  
23 to their education level (illiterate/unschooled, primary school graduates, primary education  
24 graduates, high school graduates, university graduates). Individuals participating in the study  
25 received the code “1” if they were exposed to tobacco smoke and “0” if they did not. In the  
26 study, a separate binary logit model was established for each education level.  
27  
28  
29  
30  
31  
32

### 33 **Independent variables**

34  
35 The independent variables included in the study are the ones that are available in the Turkey  
36 Health Survey and that come to the fore as a result of the literature review. The independent  
37 variables of the study are as follows; age (34 and under, 35–34, 45–54 and 55+), gender (male,  
38 female), marital status (never married, married, divorced/spouse died), employment status (yes,  
39 no), general health status (very good/good, moderate, poor/very bad), the status of receiving  
40 psycho-social support health services from primary care health institutions (yes, no), alcohol  
41 use (yes, no), tobacco use status (yes, no), and the ability to afford treatment (yes, no).  
42  
43  
44  
45  
46  
47  
48

49 Ordinal and nominal variables were defined as dummy variables in order to observe the impacts  
50 of the categories of all variables to be included in the binary logistic regression model [21].  
51  
52

### 53 **Analysis method**

54  
55 Survey statistics in Stata 15 (Stata Corporation) were used to account for the complex sampling  
56 design and weights. Weighted analysis was performed [22]. Primarily, the tobacco exposure of  
57 the individuals participating in the research and the frequency and percentages of the  
58  
59  
60

independent variables were obtained. In this study, binary logistic regression method was used to investigate the differences in tobacco exposure according to education levels.

Binary logistic regression was conducted to determine the risk factors that were influential on the exposure to tobacco smoke. The particular analysis is used to study the relationship between the dependent variable and the independent variable(s) in cases where the result (dependent) variable has two options (binary/dichotomy). Binary logistic regression not only provides the opportunity to evaluate the statistical significance of each independent variable as a risk factor but also the opportunity to calculate the odds ratio [23].

## RESULTS

### Descriptive statistics

In the study, it was determined that the exposure to tobacco smoke by the individual who are illiterate/ unschooled was 32.61%, by the primary school graduates it was 34.32%, by the primary education graduates it was 41.75%, by the high school graduates it was 41.04% and by the university graduates it was 40.34%.

The findings regarding the factors related to the exposure of individuals to tobacco smoke according to their education level in Turkey are shown in Table 1.

**Table 1.** Findings with respect to the factors affecting individuals' exposure to tobacco smoke by education level

| Variables             | Entire Model<br>f (%) | Model 1<br>f (%) | Model 2<br>f (%) | Model 3<br>f (%) | Model 4<br>f (%) | Model 5<br>f (%) |
|-----------------------|-----------------------|------------------|------------------|------------------|------------------|------------------|
| <b>Age</b>            |                       |                  |                  |                  |                  |                  |
| <b>34 and under</b>   | 5800<br>(33.9)        | 271<br>(12.4)    | 477<br>(8.5)     | 1929<br>(65.1)   | 1586<br>(48.9)   | 1537<br>(50.1)   |
| <b>35-44</b>          | 3395<br>(19.9)        | 212<br>(9.7)     | 1238<br>(22.1)   | 410<br>(13.8)    | 780<br>(24.0)    | 755<br>(24.6)    |
| <b>45-54</b>          | 2918<br>(17.1)        | 301<br>(13.7)    | 1527<br>(27.2)   | 320<br>(10.8)    | 402<br>(12.4)    | 368<br>(12.0)    |
| <b>55 +</b>           | 4971<br>(19.1)        | 1410<br>(64.3)   | 2370<br>(42.2)   | 306<br>(10.3)    | 478<br>(14.7)    | 407<br>(13.3)    |
| <b>Gender</b>         |                       |                  |                  |                  |                  |                  |
| <b>Male</b>           | 7784<br>(45.6)        | 392<br>(17.9)    | 2508<br>(44.7)   | 1595<br>(53.8)   | 1711<br>(52.7)   | 1578<br>(51.5)   |
| <b>Female</b>         | 9300<br>(54.4)        | 1802<br>(82.1)   | 3104<br>(55.3)   | 1370<br>(46.2)   | 1535<br>(47.3)   | 1489<br>(48.5)   |
| <b>Marital status</b> |                       |                  |                  |                  |                  |                  |
| <b>Never married</b>  | 3610<br>(21.1)        | 111<br>(5.1)     | 245<br>(4.4)     | 1263<br>(42.6)   | 1081<br>(33.3)   | 910<br>(29.7)    |

|                                    |                 |                |                |                |                |                |
|------------------------------------|-----------------|----------------|----------------|----------------|----------------|----------------|
| <b>Married</b>                     | 11726<br>(68.6) | 1471<br>(67.0) | 4712<br>(84.0) | 1579<br>(53.3) | 1979<br>(61.0) | 1985<br>(64.7) |
| <b>Divorced/Spouse died</b>        | 1748<br>(10.2)  | 612<br>(27.9)  | 655<br>(11.7)  | 123<br>(4.1)   | 186<br>(5.7)   | 172<br>(5.6)   |
| <b>General health status</b>       |                 |                |                |                |                |                |
| <b>Very good/good</b>              | 9988<br>(58.5)  | 580<br>(26.4)  | 2514<br>(44.8) | 2129<br>(71.8) | 2381<br>(73.4) | 2384<br>(77.7) |
| <b>Moderate</b>                    | 5214<br>(30.5)  | 870<br>(39.7)  | 2312<br>(41.2) | 697<br>(23.5)  | 734<br>(22.6)  | 601<br>(19.6)  |
| <b>Poor/Very bad</b>               | 1882<br>(11.0)  | 744<br>(33.9)  | 786<br>(14.0)  | 139<br>(4.7)   | 131<br>(4.0)   | 82<br>(2.7)    |
| <b>Employment status</b>           |                 |                |                |                |                |                |
| <b>No</b>                          | 10557<br>(61.8) | 1913<br>(87.2) | 3763<br>(67.1) | 1905<br>(64.2) | 1873<br>(57.7) | 1103<br>(36.0) |
| <b>Yes</b>                         | 6527<br>(38.2)  | 281<br>(12.8)  | 1849<br>(32.9) | 1060<br>(35.8) | 1373<br>(42.3) | 1964<br>(64.0) |
| <b>Alcohol use</b>                 |                 |                |                |                |                |                |
| <b>No</b>                          | 14357<br>(85.1) | 2171<br>(99.0) | 5042<br>(89.8) | 2558<br>(86.3) | 2575<br>(79.3) | 2191<br>(71.4) |
| <b>Yes</b>                         | 2547<br>(14.9)  | 23<br>(1.0)    | 570<br>(10.2)  | 407<br>(13.7)  | 671<br>(20.7)  | 876<br>(28.6)  |
| <b>Psycho-social support</b>       |                 |                |                |                |                |                |
| <b>No</b>                          | 15955<br>(93.4) | 2057<br>(93.8) | 5200<br>(92.7) | 2809<br>(94.7) | 3033<br>(93.4) | 2856<br>(93.1) |
| <b>Yes</b>                         | 1129<br>(6.6)   | 137<br>(6.2)   | 412<br>(7.3)   | 156<br>(5.3)   | 213<br>(6.6)   | 211<br>(6.9)   |
| <b>Tobacco use</b>                 |                 |                |                |                |                |                |
| <b>No</b>                          | 11853<br>(69.4) | 1881<br>(85.7) | 3924<br>(69.9) | 1968<br>(66.4) | 1984<br>(61.1) | 2096<br>(68.3) |
| <b>Yes</b>                         | 5231<br>(30.6)  | 313<br>(14.3)  | 1688<br>(30.1) | 997<br>(33.6)  | 1262<br>(38.9) | 971<br>(31.7)  |
| <b>Ability to afford treatment</b> |                 |                |                |                |                |                |
| <b>No</b>                          | 1349<br>(7.9)   | 172<br>(7.8)   | 405<br>(7.2)   | 309<br>(10.4)  | 250<br>(7.7)   | 213<br>(6.9)   |
| <b>Yes</b>                         | 15735<br>(92.1) | 2022<br>(92.2) | 5207<br>(92.8) | 2656<br>(89.6) | 2996<br>(92.3) | 2854<br>(93.1) |
| <b>Education</b>                   |                 |                |                |                |                |                |
| <b>Illiterate/ Unschool</b>        | 2194<br>(12.8)  |                |                |                |                |                |
| <b>Primary school graduates</b>    | 5612<br>(32.8)  |                |                |                |                |                |
| <b>Primary education graduates</b> | 2965<br>(17.4)  |                |                |                |                |                |
| <b>High school graduates</b>       | 3246<br>(19.0)  |                |                |                |                |                |
| <b>University graduates</b>        | 3067<br>(18.0)  |                |                |                |                |                |

Model 1: Illiterate/ unschooled, Model 2: Primary school graduates, Model 3: Primary education graduates, Model 4: High school graduates; Model 5: University graduates

## Model estimation

In the study, it was tested whether there was a multicollinearity between the independent variables to be included in the binary logistic regression model. It is thought that those with variance inflation factor (VIF) values of 5 and above cause moderate multicollinearity, and

those of 10 or more high degree of multicollinearity [24]. In this study, there is no variable that causes the problem of multicollinearity between the variables (Appendix 1).

The estimated binary logistic regression model results are given in Table 2. In the entire model estimated for all the individuals participating in the research, it has been observed that the education level of the individuals was correlated with exposure to tobacco smoke. According to Table 2, it has been found that the variables of age (55+), marital status (never married) and tobacco use were significant in Model 1, which was estimated for illiterate/ unschooled. In Model 2, estimated for primary school graduates, it has been observed that the variables of age, marital status (divorced/spouse died), general health status (moderate), receiving psycho-social support and tobacco use were significant. In Model 3, estimated for primary education graduates, it has been seen that the variables of age, gender, general health status (moderate), employment status and tobacco use were significant. In Model 4, estimated for high school graduates, the variables including age (45-54, 55+), gender, marital status (never married), general health status (moderate), and tobacco use found to be significant. It has been observed that the variables of age, gender, marital status (never married) and tobacco use were significant in Model 5, which was estimated for university graduates.

**Table 2.** Estimated model results of factors related to individuals' exposure to tobacco smoke by education level

| Variables                                                         | Entire Model                   | Model 1                        | Model 2                        | Model 3                        | Model 4                        | Model 5                        |
|-------------------------------------------------------------------|--------------------------------|--------------------------------|--------------------------------|--------------------------------|--------------------------------|--------------------------------|
|                                                                   | $\beta$                        | $\beta$                        | $\beta$                        | $\beta$                        | $\beta$                        | $\beta$                        |
| <b>Age (reference category: 34 and under)</b>                     |                                |                                |                                |                                |                                |                                |
| <b>35-44</b>                                                      | -0.279 <sup>a</sup><br>(0.059) | -0.302<br>(0.230)              | -0.239 <sup>c</sup><br>(0.132) | -0.400 <sup>a</sup><br>(0.148) | -0.120<br>(0.122)              | -0.365 <sup>a</sup><br>(0.112) |
| <b>45-54</b>                                                      | -0.388 <sup>a</sup><br>(0.065) | -0.449<br>(0.224)              | -0.334 <sup>b</sup><br>(0.131) | -0.523 <sup>a</sup><br>(0.159) | -0.418 <sup>a</sup><br>(0.154) | -0.408 <sup>a</sup><br>(0.145) |
| <b>55 +</b>                                                       | -0.919 <sup>a</sup><br>(0.069) | -1.455 <sup>a</sup><br>(0.205) | -0.744 <sup>a</sup><br>(0.135) | -0.874 <sup>a</sup><br>(0.183) | -0.502 <sup>a</sup><br>(0.159) | -0.836 <sup>a</sup><br>(0.161) |
| <b>Gender (reference category: male)</b>                          |                                |                                |                                |                                |                                |                                |
| <b>Female</b>                                                     | -0.245 <sup>a</sup><br>(0.044) | -0.197<br>(0.170)              | -0.087<br>(0.081)              | -0.421 <sup>a</sup><br>(0.105) | -0.249 <sup>a</sup><br>(0.096) | -0.263 <sup>a</sup><br>(0.092) |
| <b>Marital status (reference category: married)</b>               |                                |                                |                                |                                |                                |                                |
| <b>Never married</b>                                              | 0.263 <sup>a</sup><br>(0.056)  | -0.552 <sup>b</sup><br>(0.263) | 0.240<br>(0.160)               | 0.051<br>(0.113)               | 0.466 <sup>a</sup><br>(0.113)  | 0.451 <sup>a</sup><br>(0.102)  |
| <b>Divorced/Spouse died</b>                                       | -0.129 <sup>c</sup><br>(0.072) | -0.077<br>(0.158)              | -0.289 <sup>b</sup><br>(0.115) | 0.321<br>(0.232)               | 0.067<br>(0.199)               | 0.076<br>(0.199)               |
| <b>General health status (reference category: very good/good)</b> |                                |                                |                                |                                |                                |                                |
| <b>Moderate</b>                                                   | 0.128 <sup>a</sup><br>(0.046)  | -0.128<br>(0.152)              | 0.178 <sup>a</sup><br>(0.077)  | 0.282 <sup>b</sup><br>(0.112)  | 0.184 <sup>c</sup><br>(0.104)  | -0.084<br>(0.114)              |
| <b>Poor/Very bad</b>                                              | 0.100<br>(0.073)               | 0.036<br>(0.160)               | 0.182<br>(0.113)               | 0.153<br>(0.209)               | -0.035<br>(0.228)              | -0.110<br>(0.298)              |
| <b>Employment status (reference category: no)</b>                 |                                |                                |                                |                                |                                |                                |

|                                                              |                                |                               |                                |                                |                                |                                |
|--------------------------------------------------------------|--------------------------------|-------------------------------|--------------------------------|--------------------------------|--------------------------------|--------------------------------|
| <b>Yes</b>                                                   | -0.035<br>(0.046)              | -0.01<br>(0.177)              | 0.102<br>(0.084)               | -0.227 <sup>b</sup><br>(0.108) | -0.099<br>(0.100)              | 0.123<br>(0.103)               |
| <b>Alcohol use (reference category: no)</b>                  |                                |                               |                                |                                |                                |                                |
| <b>Yes</b>                                                   | 0.038<br>(0.055)               | -0.807<br>(0.583)             | 0.150<br>(0.115)               | -0.060<br>(0.134)              | 0.122<br>(0.105)               | 0.002<br>(0.096)               |
| <b>Psycho-social support (reference category: no)</b>        |                                |                               |                                |                                |                                |                                |
| <b>Yes</b>                                                   | 0.140 <sup>c</sup><br>(0.077)  | -0.286<br>(0.249)             | 0.228 <sup>c</sup><br>(0.132)  | 0.283<br>(0.196)               | 0.143<br>(0.173)               | 0.011<br>(0.169)               |
| <b>Tobacco use (reference category: no)</b>                  |                                |                               |                                |                                |                                |                                |
| <b>Yes</b>                                                   | 0.837 <sup>a</sup><br>(0.043)  | 1.312 <sup>a</sup><br>(0.173) | 1.019 <sup>a</sup><br>(0.078)  | 0.990 <sup>a</sup><br>(0.105)  | 0.526 <sup>a</sup><br>(0.092)  | 0.570 <sup>a</sup><br>(0.093)  |
| <b>Ability to afford treatment (reference category: no)</b>  |                                |                               |                                |                                |                                |                                |
| <b>Yes</b>                                                   | 0.036<br>(0.070)               | -0.163<br>(0.214)             | 0.177<br>(0.130)               | 0.005<br>(0.146)               | 0.216<br>(0.166)               | -0.146<br>(0.171)              |
| <b>Education (reference category: illiterate/unschooled)</b> |                                |                               |                                |                                |                                |                                |
| <b>Primary school graduates</b>                              | -0.255 <sup>a</sup><br>(0.068) |                               |                                |                                |                                |                                |
| <b>Primary education graduates</b>                           | -0.405 <sup>a</sup><br>(0.081) |                               |                                |                                |                                |                                |
| <b>High school graduates</b>                                 | -0.389 <sup>a</sup><br>(0.079) |                               |                                |                                |                                |                                |
| <b>University graduates</b>                                  | -0.364 <sup>a</sup><br>(0.080) |                               |                                |                                |                                |                                |
| <b>Constant</b>                                              | -0.163<br>(0.108)              | 0.383<br>(0.296)              | -0.865 <sup>a</sup><br>(0.179) | -0.365 <sup>b</sup><br>(0.182) | -0.754 <sup>a</sup><br>(0.200) | -0.372 <sup>b</sup><br>(0.188) |

<sup>a</sup>p<.01; <sup>b</sup>p<.05; <sup>c</sup>p<.10

Model 1: Illiterate/unschooled, Model 2: Primary school graduates, Model 3: Primary education graduates, Model 4: High school graduates; Model 5: University graduates

The marginal effects of factors related to tobacco smoke exposure according to education levels are given in Table 3.

When the individuals who are illiterate/unschooled are concerned, an individual aged 45-54 is 23.3% less likely to be exposed to tobacco smoke than an individual aged 34 and under (reference group). Similarly, an illiterate person aged 55 and over is 91.6% less likely to be exposed to tobacco smoke than an individual aged 34 and younger. When the marital status variable is examined, it has been found that an illiterate individual who has never been married is 39.3% less likely to be exposed to tobacco smoke than a married individual. An illiterate tobacco user is 76.1% more likely to be exposed to tobacco smoke than a non-tobacco user.

Among primary school graduates, an individual aged 35-44 is 14.2% less likely to be exposed to tobacco smoke than an individual aged 34 and younger (reference group). Similarly, a primary school graduate aged 55 and over is 48.1% less likely to be exposed to tobacco smoke than an individual aged 34 and younger. When the marital status variable is examined, it has been observed that a divorced/spouse died, primary school graduate individual is 19.8% less likely to be exposed to tobacco smoke than a married individual. A primary school graduate

1  
2  
3 individual with a moderate general health status is 11.7% more likely to be exposed to tobacco  
4 smoke than an individual with a very good/good general health status. Similarly, a primary  
5 school graduate receiving psycho-social support is 14.5% more likely to be exposed to tobacco  
6 smoke than an individual receiving no psycho-social support. A primary school graduate using  
7 tobacco products is 63.4% more likely to be exposed to tobacco smoke than an individual who  
8 does not use tobacco products.  
9

10  
11  
12  
13  
14 Among primary education graduates, an individual aged 35-44 is 23.6% less likely to be  
15 exposed to tobacco smoke than an individual aged 34 and under (reference group). Similarly, a  
16 primary education graduate aged 55 and over is 56% less likely to be exposed to tobacco smoke  
17 than an individual aged 34 and under. It has been seen that a woman who is a primary education  
18 graduate is 24.8% less likely to be exposed to tobacco smoke than a man of the same education  
19 level. It was found that the probability of being exposed to tobacco smoke is 16% higher for a  
20 primary education graduate with a moderate general health status than an individual with a very  
21 good/good general health status. An employed individual with a primary education degree is  
22 13.4% less likely to be exposed to tobacco smoke than an unemployed individual. It has been  
23 found that a primary education graduate using tobacco products is 53.9% more likely to be  
24 exposed to tobacco smoke than an individual who does not smoke.  
25  
26  
27  
28  
29  
30  
31  
32  
33

34 In high school graduates, an individual in the 45-54 range is 25.4% less likely to be exposed to  
35 tobacco smoke than an individual aged 34 and under (reference group) and an individual aged  
36 55 and over is 31% less likely to be exposed to tobacco smoke than an individual aged 34 or  
37 younger. An unmarried high school graduate is 27.1% more likely to be exposed to tobacco  
38 smoke than a married individual. It has been found that a high school graduate with a moderate  
39 general health status is 10.6% more likely to be exposed to tobacco smoke than an individual  
40 with a very good/good general health condition. It is seen that a high school graduate using  
41 tobacco products is 30.3% more likely to be exposed to tobacco smoke than an individual who  
42 does not smoke.  
43  
44  
45  
46  
47  
48  
49  
50

51 When the university graduates are concerned, an individual aged 45-54 is 21.6% less likely to  
52 be exposed to tobacco smoke than an individual aged 34 and under (reference group) and an  
53 individual aged 55 and over is 54% less likely to be exposed to tobacco smoke than an  
54 individual aged 34 or younger. According to the findings a university graduate who has never  
55 been married is 26.4% more likely to be exposed to tobacco smoke than a married individual.  
56 A university graduate woman is 15.8% less likely to be exposed to tobacco smoke than a man  
57  
58  
59  
60

of the same education level. It has been observed that a university graduate individual using tobacco products is 32.7% more likely to be exposed to tobacco smoke than an individual who does not smoke.

**Table 3.** Marginal effects of factors associated with individuals' exposure to tobacco smoke by education level

| Variables                                                         | Entire Model                   | Model 1                        | Model 2                        | Model 3                        | Model 4                        | Model 5                        |
|-------------------------------------------------------------------|--------------------------------|--------------------------------|--------------------------------|--------------------------------|--------------------------------|--------------------------------|
|                                                                   | ME                             | ME                             | ME                             | ME                             | ME                             | ME                             |
| <b>Age (reference category: 34 and under)</b>                     |                                |                                |                                |                                |                                |                                |
| 35-44                                                             | -0.161 <sup>a</sup><br>(0.345) | -0.151<br>(0.116)              | -0.142 <sup>c</sup><br>(0.076) | -0.236 <sup>b</sup><br>(0.091) | -0.069<br>(0.070)              | -0.216 <sup>a</sup><br>(0.069) |
| 45-54                                                             | -0.229 <sup>a</sup><br>(0.392) | -0.233 <sup>b</sup><br>(0.115) | -0.201 <sup>a</sup><br>(0.076) | -0.315 <sup>a</sup><br>(0.102) | -0.254 <sup>a</sup><br>(0.098) | -0.244 <sup>a</sup><br>(0.091) |
| 55 +                                                              | -0.596 <sup>a</sup><br>(0.046) | -0.916 <sup>a</sup><br>(0.112) | -0.481 <sup>a</sup><br>(0.082) | -0.560 <sup>a</sup><br>(0.128) | -0.310 <sup>a</sup><br>(0.103) | -0.540 <sup>a</sup><br>(0.113) |
| <b>Gender (reference category: male)</b>                          |                                |                                |                                |                                |                                |                                |
| Female                                                            | -0.152 <sup>a</sup><br>(0.027) | -0.131<br>(0.111)              | -0.057<br>(0.053)              | -0.248 <sup>a</sup><br>(0.063) | -0.148<br>(0.057)              | -0.158 <sup>a</sup><br>(0.055) |
| <b>Marital status (reference category: married)</b>               |                                |                                |                                |                                |                                |                                |
| Never married                                                     | 0.159 <sup>a</sup><br>(0.033)  | -0.393 <sup>b</sup><br>(0.198) | 0.151<br>(0.097)               | 0.030<br>(0.066)               | 0.271 <sup>a</sup><br>(0.064)  | 0.264 <sup>a</sup><br>(0.058)  |
| Divorced/Spouse died                                              | -0.084 <sup>c</sup><br>(0.047) | -0.052<br>(0.107)              | -0.198 <sup>b</sup><br>(0.081) | 0.178<br>(0.121)               | 0.042<br>(0.123)               | 0.048<br>(0.124)               |
| <b>General health status (reference category: very good/good)</b> |                                |                                |                                |                                |                                |                                |
| Moderate                                                          | 0.079 <sup>a</sup><br>(0.028)  | -0.087<br>(0.103)              | 0.117 <sup>b</sup><br>(0.051)  | 0.160 <sup>a</sup><br>(0.061)  | 0.106 <sup>c</sup><br>(0.059)  | -0.051<br>(0.069)              |
| Poor/Very bad                                                     | 0.062<br>(0.045)               | 0.024<br>(0.106)               | 0.120<br>(0.073)               | 0.089<br>(0.118)               | -0.021<br>(0.138)              | -0.066<br>(0.184)              |
| <b>Employment status (reference category: no)</b>                 |                                |                                |                                |                                |                                |                                |
| Yes                                                               | -0.022<br>(0.029)              | -0.007<br>(0.119)              | 0.067<br>(0.055)               | -0.134 <sup>b</sup><br>(0.065) | -0.058<br>(0.059)              | 0.074<br>(0.062)               |
| <b>Tobacco use (reference category: no)</b>                       |                                |                                |                                |                                |                                |                                |
| Yes                                                               | 0.024<br>(0.034)               | -0.598<br>(0.467)              | 0.096<br>(0.072)               | -0.035<br>(0.079)              | 0.071<br>(0.060)               | 0.001<br>(0.057)               |
| <b>Psycho-social support (reference category: no)</b>             |                                |                                |                                |                                |                                |                                |
| Yes                                                               | 0.085 <sup>c</sup><br>(0.046)  | -0.199<br>(0.179)              | 0.145 <sup>c</sup><br>(0.081)  | 0.157<br>(0.103)               | 0.082<br>(0.097)               | 0.006<br>(0.101)               |
| <b>Tobacco use (reference category: no)</b>                       |                                |                                |                                |                                |                                |                                |
| Yes                                                               | 0.492 <sup>a</sup><br>(0.024)  | 0.761 <sup>a</sup><br>(0.084)  | 0.634 <sup>a</sup><br>(0.046)  | 0.539 <sup>a</sup><br>(0.054)  | 0.303 <sup>a</sup><br>(0.052)  | 0.327 <sup>a</sup><br>(0.052)  |
| <b>Ability to afford treatment (reference category: no)</b>       |                                |                                |                                |                                |                                |                                |
| Yes                                                               | 0.023<br>(0.044)               | -0.108<br>(0.139)              | 0.119<br>(0.090)               | 0.003<br>(0.085)               | 0.132<br>(0.105)               | -0.085<br>(0.097)              |
| <b>Education (reference category: illiterate/unschooled)</b>      |                                |                                |                                |                                |                                |                                |
| Primary school graduates                                          | -0.149 <sup>a</sup><br>(0.039) |                                |                                |                                |                                |                                |
| Primary education graduates                                       | -0.243 <sup>a</sup><br>(0.047) |                                |                                |                                |                                |                                |
| High school graduates                                             | -0.232 <sup>a</sup><br>(0.046) |                                |                                |                                |                                |                                |



|                             |                                |
|-----------------------------|--------------------------------|
| <b>University graduates</b> | -0.216 <sup>a</sup><br>(0.047) |
|-----------------------------|--------------------------------|

<sup>a</sup>p<.01; <sup>b</sup>p<.05; <sup>c</sup>p<.10

Model 1: Illiterate/ unschooled, Model 2: Primary school graduates, Model 3: Primary education graduates, Model 4: High school graduates;  
Model 5: University graduates

## DISCUSSION

Using tobacco products leads to significant health problems not only for people using them, but also for those who do not use tobacco products due to tobacco smoke spreading to the environment. Every passing year new evidence is obtained with respect to the health risks posed by the exposure of others to tobacco smoke. Therefore, it is necessary to know the determinants of tobacco smoke in order to reduce the prevalence of secondhand smoke.

In this study, data of 17,084 individuals participated in the Turkey Health Survey conducted by the Turkish Statistical Institute in 2019 were used. In the study, the factors affecting the exposure of individuals to tobacco smoke in Turkey according to their education levels were determined using binary logistic regression analysis.

In the study, it was found that the variables of age, gender, marital status, general health status, employment status, receipt of psycho-social support and tobacco use were correlated with exposure to tobacco smoke. Moreover, it was determined that the significance and effect of the variables in exposure to tobacco smoke differ according to the education level of the individuals according to the findings of the study.

In the study, it was determined that the probability of exposure to tobacco decreased as age increased. Similar results were obtained in the other studies [25-28]. As people become older, they realize that the use of tobacco products constitute a risk factor for a variety of chronic diseases and gain more awareness in terms of health such as changing negative lifestyle choices like using tobacco [29]. It has been revealed by many studies that high levels/dangerous/risky use of tobacco products leads older look than the real age for the individuals [30]. Furthermore, the reason for the decrease in the use of tobacco products by the individuals with increasing age may be the obsession of the individuals in terms of looking young which makes them more cautious with respect to the use of tobacco products [7]. On the other hand, as age increases, people take their health more seriously and have more time and energy to participate in anti-tobacco campaigns. In this context, as age increases, the prevalence of people who quit using tobacco products increases, therefore the probability of exposure to tobacco smoke decreases [29].

1  
2  
3 It has been determined that individuals who receive psycho-social support are more exposed to  
4 tobacco smoke than individuals who do not receive psycho-social support. There are studies  
5 with similar findings [31, 32]. On the other hand, in a study, it was determined that individuals  
6 who do not receive psycho-social support are more exposed to tobacco smoke than individuals  
7 who receive psycho-social support [33].  
8  
9

10  
11  
12 In the study, it was determined that individuals with moderate and very good general health  
13 status were exposed to tobacco smoke more than individuals with good general health status. It  
14 has been argued in the studies that individuals who care about their health are more careful in  
15 terms of eliminating the exposure to tobacco smoke [31, 32].  
16  
17

18  
19  
20 It has been found that individuals who are employed are less exposed to tobacco smoke than  
21 those unemployed. In a study through which a similar finding was obtained, it was argued that  
22 the risk of exposure to tobacco increases since unemployed individuals stay at home longer  
23 [34]. However, there are also studies in the literature concluding that individuals who are  
24 employed are more exposed to tobacco smoke than those unemployed [26, 27].  
25  
26  
27  
28  
29

30  
31 The people exposed to tobacco use for a certain period also experience health problems similar  
32 to those using tobacco products. According to the study, individuals using tobacco products are  
33 more exposed to tobacco smoke than individuals who do not use tobacco products. Similar  
34 findings were obtained in some studies in the literature [22, 35].  
35  
36  
37

38  
39 In the study, it was determined that individuals who are illiterate and have never been married  
40 are less exposed to tobacco smoke than married individuals. There are studies in the literature  
41 with similar findings [25]. On the other hand, it was also found in the study that individuals  
42 graduated from a primary school with a marital status as divorced/spouse died, were less  
43 exposed to tobacco smoke than married individuals. Similar results were obtained in some  
44 studies [36, 37]. Studies have suggested that this may be due to the fact that most of the  
45 individuals live alone and get less exposed to smoking at home [29].  
46  
47  
48  
49

50  
51 According to the study, it has been determined that men are more exposed to tobacco smoke  
52 than women. Similar results were obtained in studies [26]. On the other hand, there are studies  
53 in the literature arguing that women are more exposed to tobacco smoke than men. Studies have  
54 reported that this may be highly correlated with the socioeconomic profile of women [25].  
55 Moreover, some studies have found that women are at higher risk of SHS exposure because  
56  
57  
58  
59  
60

1  
2  
3 they spend more time doing housework in regulated industries that are less likely to challenge  
4 SHS policies [38].  
5

## 6 7 **CONCLUSION** 8

9  
10 As a result of the study, it is emphasized that men, young individuals, individuals with moderate  
11 and very good general health status, using tobacco, who are unemployed and receive psycho-  
12 social support should be targeted. Such groups require more protection from SHS exposure.  
13 Appropriate strategies should be developed to reduce SHS exposure by considering the public  
14 health strategies to raise awareness of the adverse health effects of SHS exposure and the  
15 determinants of exposure to tobacco. The National Tobacco Control Program Action Plan,  
16 prepared under the coordination of the Ministry of Health, came into effect on January 27, 2015  
17 in Turkey for this purpose. The strategies of said action plan include ensuring that the right  
18 attitudes and behaviors are displayed by the society to the violations by raising the awareness  
19 that protection from second hand smoke exposure is a right in terms of health in the society,  
20 making necessary legislative changes to expand the areas where tobacco and tobacco products  
21 are not used, simultaneously with the efforts to increase the awareness and advocacy of the  
22 society on the issue. In addition, the National Tobacco Control Program Action Plan includes  
23 strategies for establishing the necessary system for determining the level of second hand smoke  
24 exposure in the society and monitoring it regularly, and for starting and maintaining social  
25 support for the prevention of passive exposure in homes/living areas/private properties.  
26  
27  
28  
29  
30  
31  
32  
33  
34  
35  
36  
37  
38

39 Policies to restrict tobacco use in public places are necessary for a variety of reasons. Primarily,  
40 the majority of the public is uncomfortable with SHS exposure and considers this exposure to  
41 be harmful to health. However, most non-smokers do not take personal action to avoid exposure  
42 to SHS. Government agencies need to act to protect non-smokers. Moreover, restricting tobacco  
43 use in public places may increase the likelihood to use less tobacco products or quit them  
44 completely.  
45  
46  
47  
48  
49

50 In the future, more objective measures of SHS exposure may overcome this limitation. Future  
51 studies should further explore determinants that cannot be identified through qualitative  
52 research. Objective measurement of smoke inhalation can be helpful in avoiding reporting bias.  
53 In addition, studies must be considered within country variation and recognize that there may  
54 be large variations in prevalence and determinants between regions within the same country.  
55  
56  
57  
58  
59  
60

1  
2  
3 In future studies, key factors influencing the social acceptability of SHS exposure by the  
4 individuals can be identified. Identifying these factors is critical in planning and designing  
5 tobacco prevention programs targeting SHS exposure. If health risks are adequately  
6 communicated and guided by the demands of (several) target groups, the social acceptability of  
7 tobacco exposure will be further reduced.  
8  
9  
10  
11  
12  
13  
14  
15  
16  
17  
18  
19  
20  
21  
22  
23  
24  
25  
26  
27  
28  
29  
30  
31  
32  
33  
34  
35  
36  
37  
38  
39  
40  
41  
42  
43  
44  
45  
46  
47  
48  
49  
50  
51  
52  
53  
54  
55  
56  
57  
58  
59  
60

For peer review only

## References

1. Alkan, Ö. and A. Demir, *Investigation and detection of risk factors related to the period without tobacco consumption*. *Addicta: The Turkish Journal on Addictions*, 2019. **6**(4): p. 99-115.
2. WHO, *WHO global report: mortality attributable to tobacco*, 2012: Switzerland: Geneva
3. Yousuf, H., et al., *Estimated worldwide mortality attributed to secondhand tobacco smoke exposure, 1990-2016*. *JAMA Network Open*, 2020. **3**(3): p. e201177-e201177.
4. WHO, *Enforcing bans on tobacco advertising, promotion and sponsorship: WHO Report on the global tobacco epidemic*, 2013: Switzerland: Geneva.
5. Rodgman, A. and T.A. Perfetti, *The chemical components of tobacco and tobacco smoke*. Second ed. 2013, New York: CRC Press.
6. Apelberg, B.J., et al., *Environmental monitoring of secondhand smoke exposure*. *Tobacco Control*, 2013. **22**(3): p. 147-155.
7. Alkan, Ö. and Ş. Ünver, *Tobacco smoke exposure among women in Turkey and determinants*. *Journal of Substance Use*, 2021: p. 1-7.
8. Dinas, P.C., et al., *Acute effects of second-hand smoke on complete blood count*. *International Journal of Environmental Health Research*, 2014. **24**(1): p. 56-62.
9. Öberg, M., et al., *Worldwide burden of disease from exposure to second-hand smoke: a retrospective analysis of data from 192 countries*. *The lancet*, 2011. **377**(9760): p. 139-146.
10. Barnoya, J. and S.A. Glantz, *Cardiovascular effects of secondhand smoke: nearly as large as smoking*. *Circulation*, 2005. **111**(20): p. 2684-2698.
11. Simons, E., et al., *Maternal second-hand smoke exposure in pregnancy is associated with childhood asthma development*. *The Journal of Allergy and Clinical Immunology: In Practice*, 2014. **2**(2): p. 201-207.

12. Faber, T., et al., *Effect of tobacco control policies on perinatal and child health: a systematic review and meta-analysis*. The Lancet Public Health, 2017. **2**(9): p. e420-e437.
13. Sun, L.-Y., et al., *Affecting factors of secondhand smoke exposure in Korea: Focused on different exposure locations*. Journal of Korean medical science, 2016. **31**(9): p. 1362-1372.
14. WHO, *WHO Framework Convention on Tobacco Control*, 2009: Switzerland: Geneva
15. Kaplan, B., et al., *Evaluation of Secondhand smoke using PM2.5 and observations in a random stratified sample in hospitality venues from 12 cities*. International Journal of Environmental Research and Public Health, 2019. **16**(1381): p. 1-9.
16. Kaplan, B., et al., *Smoke-free Turkey: Evaluation of outdoor areas of public places*. Environmental Research, 2019. **175**: p. 79-83.
17. Health, T.M.o. *Küresel yetişkin tütün araştırması Türkiye 2012. Sağlık Bakanlığı (Ministry of Health) Yayın No: 948. 2014 20.03.2020*]; Available from: <https://havanikoru.saglik.gov.tr/dosya/dokumanlar/yayinlar/KYTA-2012-TR-25-07-2014.pdf>.
18. Lin, P.-L., et al., *Second-hand smoke exposure and the factors associated with avoidance behavior among the mothers of pre-school children: a school-based cross-sectional study*. BMC Public Health, 2010. **10**(1): p. 1-9.
19. Shwarz, M., B. Collins, and U. Nair, *Factors associated with maternal depressive symptoms among low-income, African American smokers enrolled in a secondhand smoke reduction programme*. Mental Health in Family Medicine, 2012. **9**(4): p. 275-287.
20. TurkStat, *Türkiye Sağlık Araştırması (Turkey Health Survey) Yayın No: 4590, 2020*: Ankara.
21. Alkan, Ö., H. Abar, and Ö. Gençer, *Analysis of factors affecting alcohol and tobacco concurrent use by bivariate probit model in Turkey*. Environmental Science and Pollution Research, 2021: p. 1-8.

- 1  
2  
3 22. Alkan, Ö. and H. Abar, *Determination of factors influencing tobacco consumption in*  
4 *Turkey using categorical data analyses1*. Archives of Environmental & Occupational  
5 Health, 2020. **75**(1): p. 27-35.  
6  
7  
8  
9 23. Alkan, Ö. and H.H. Tekmanlı, *Determination of the factors affecting sexual violence*  
10 *against women in Turkey: a population-based analysis*. BMC Women's Health, 2021.  
11 **21**(1): p. 1-15.  
12  
13  
14  
15 24. Ünver, Ş. and Ö. Alkan, *Determinants of e-commerce use at different educational*  
16 *levels: empirical evidence from Turkey*. International Journal of Advanced Computer  
17 Science and Applications, 2021. **12**(3): p. 40-49.  
18  
19  
20  
21 25. Bonevski, B., et al., *Smoky homes: Gender, socioeconomic and housing disparities in*  
22 *second hand tobacco smoke (SHS) exposure in a large population-based Australian*  
23 *cohort*. Preventive Medicine, 2014. **60**: p. 95-101.  
24  
25  
26  
27 26. Fischer, F. and A. Kraemer, *Factors associated with secondhand smoke exposure in*  
28 *different settings: Results from the German Health Update (GEDA) 2012*. BMC Public  
29 Health, 2016. **16**(1): p. 1-9.  
30  
31  
32  
33 27. Stafylis, C., et al., *Prevalence and determinants of smoking and secondhand smoke*  
34 *exposure in a rural population of central Greece: a cross-sectional study*. Rural and  
35 Remote Health, 2018. **18**(2).  
36  
37  
38  
39 28. Lee, B.-E. and E.-H. Ha, *Exposure to environmental tobacco smoke among South*  
40 *Korean adults: a cross-sectional study of the 2005 Korea National Health and Nutrition*  
41 *Examination Survey*. Environmental Health, 2011. **10**(1): p. 1-10.  
42  
43  
44  
45 29. Li, Z., et al., *Prevalence and associated factors of passive smoking among women in*  
46 *Jilin Province, China: a cross-sectional study*. International Journal of Environmental  
47 Research and Public Health, 2015. **12**(11): p. 13970-13980.  
48  
49  
50  
51 30. Schou, A.L., et al., *Alcohol consumption, smoking and development of visible age-*  
52 *related signs: a prospective cohort study*. Journal of Epidemiology Community Health,  
53 2017. **71**(12): p. 1177-1184.  
54  
55  
56  
57  
58  
59  
60

- 1  
2  
3 31. Patten, S.B., et al., *Major depression and secondhand smoke exposure*. Journal of  
4 Affective Disorders, 2018. **225**: p. 260-264.  
5  
6
- 7 32. Zeng, Y.-N. and Y.-M. Li, *Secondhand smoke exposure and mental health in adults: A*  
8 *meta-analysis of cross-sectional studies*. Social Psychiatry and Psychiatric  
9 Epidemiology, 2016. **51**(9): p. 1339-1348.  
10  
11
- 12 33. Lam, E., et al., *Association of secondhand smoke exposure with mental health in men*  
13 *and women: cross-sectional and prospective analyses using the UK Health and Lifestyle*  
14 *Survey*. European Psychiatry, 2013. **28**(5): p. 276-281.  
15  
16
- 17 34. Alghamdi, A.S., et al., *Socioeconomic determinants of exposure to secondhand smoke*  
18 *among pregnant women*. International Journal of Women's Health and Reproduction  
19 Sciences, 2016. **4**(2): p. 59-63.  
20  
21
- 22 35. Fischer, F., et al., *Prevalence and determinants of secondhand smoke exposure among*  
23 *women in Bangladesh, 2011*. Nicotine & Tobacco Research, 2015. **17**(1): p. 58-65.  
24  
25
- 26 36. Li, Q., J. Hsia, and G. Yang, *Prevalence of smoking in China in 2010*. New England  
27 Journal of Medicine, 2011. **364**(25): p. 2469-2470.  
28  
29
- 30 37. Tanaka, K., et al., *Active and passive smoking and prevalence of periodontal disease in*  
31 *young Japanese women*. Journal of Periodontal Research, 2013. **48**(5): p. 600-605.  
32  
33
- 34 38. Greaves, L.J. and N.J. Hemsing, *Sex, gender, and secondhand smoke policies:*  
35 *implications for disadvantaged women*. American Journal of Preventive Medicine,  
36 2009. **37**(2): p. S131-S137.  
37  
38  
39  
40  
41  
42  
43  
44  
45  
46  
47  
48  
49  
50  
51  
52  
53  
54  
55  
56  
57  
58  
59  
60



**Appendix 1.** VIF values for all models

| Variables                                                         | Entire Model | Model 1 | Model 2 | Model 3 | Model 4 | Model 5 |
|-------------------------------------------------------------------|--------------|---------|---------|---------|---------|---------|
|                                                                   | VIF          | VIF     | VIF     | VIF     | VIF     | VIF     |
| <b>Age (reference category: 34 and under)</b>                     |              |         |         |         |         |         |
| 35-44                                                             | 1.70         | 1.69    | 3.04    | 1.34    | 1.6     | 1.3     |
| 45-54                                                             | 1.82         | 2.09    | 3.45    | 1.33    | 1.44    | 1.25    |
| 55 +                                                              | 2.68         | 3.16    | 4.3     | 1.51    | 1.73    | 1.56    |
| <b>Gender (reference category: male)</b>                          |              |         |         |         |         |         |
| Female                                                            | 1.38         | 1.24    | 1.42    | 1.44    | 1.35    | 1.16    |
| <b>Marital status (reference category: married)</b>               |              |         |         |         |         |         |
| Never married                                                     | 1.62         | 1.16    | 1.14    | 1.65    | 1.7     | 1.29    |
| Divorced/Spouse died                                              | 1.17         | 1.19    | 1.09    | 1.09    | 1.1     | 1.09    |
| <b>General health status (reference category: very good/good)</b> |              |         |         |         |         |         |
| Moderate                                                          | 1.26         | 1.71    | 1.23    | 1.14    | 1.12    | 1.07    |
| Poor/Very bad                                                     | 1.35         | 1.82    | 1.25    | 1.11    | 1.1     | 1.05    |
| <b>Employment status (reference category: no)</b>                 |              |         |         |         |         |         |
| Yes                                                               | 1.44         | 1.16    | 1.35    | 1.46    | 1.41    | 1.31    |
| <b>Alcohol use (reference category: no)</b>                       |              |         |         |         |         |         |
| Yes                                                               | 1.17         | 1.05    | 1.13    | 1.17    | 1.12    | 1.08    |
| <b>Psycho-social support (reference category: no)</b>             |              |         |         |         |         |         |
| Yes                                                               | 1.03         | 1.01    | 1.04    | 1.04    | 1.05    | 1.03    |
| <b>Tobacco use (reference category: no)</b>                       |              |         |         |         |         |         |
| Yes                                                               | 1.19         | 1.18    | 1.2     | 1.29    | 1.16    | 1.08    |
| <b>Ability to afford treatment (reference category: no)</b>       |              |         |         |         |         |         |
| Yes                                                               | 1.04         | 1.05    | 1.05    | 1.04    | 1.04    | 1.08    |
| <b>Education (reference category: illiterate/unschooled)</b>      |              |         |         |         |         |         |
| Primary school graduates                                          | 2.67         |         |         |         |         |         |
| Primary education graduates                                       | 2.54         |         |         |         |         |         |
| High school graduates                                             | 2.57         |         |         |         |         |         |
| University graduates                                              | 2.61         |         |         |         |         |         |

Model 1: Illiterate/ unschooled, Model 2: Primary school graduates, Model 3: Primary education graduates, Model 4: High school graduates; Model 5: University graduates

**STROBE 2007 (v4) Statement—Checklist of items that should be included in reports of *cross-sectional studies***

| Section/Topic                | Item # | Recommendation                                                                                                                                                                       | Reported on page # |
|------------------------------|--------|--------------------------------------------------------------------------------------------------------------------------------------------------------------------------------------|--------------------|
| <b>Title and abstract</b>    | 1      | (a) Indicate the study's design with a commonly used term in the title or the abstract                                                                                               | 1                  |
|                              |        | (b) Provide in the abstract an informative and balanced summary of what was done and what was found                                                                                  | 2                  |
| <b>Introduction</b>          |        |                                                                                                                                                                                      |                    |
| Background/rationale         | 2      | Explain the scientific background and rationale for the investigation being reported                                                                                                 | 5                  |
| Objectives                   | 3      | State specific objectives, including any prespecified hypotheses                                                                                                                     | 6                  |
| <b>Methods</b>               |        |                                                                                                                                                                                      |                    |
| Study design                 | 4      | Present key elements of study design early in the paper                                                                                                                              | 6-8                |
| Setting                      | 5      | Describe the setting, locations, and relevant dates, including periods of recruitment, exposure, follow-up, and data collection                                                      | 6-8                |
| Participants                 | 6      | (a) Give the eligibility criteria, and the sources and methods of selection of participants                                                                                          | 6-8                |
| Variables                    | 7      | Clearly define all outcomes, exposures, predictors, potential confounders, and effect modifiers. Give diagnostic criteria, if applicable                                             | 6-8                |
| Data sources/<br>measurement | 8*     | For each variable of interest, give sources of data and details of methods of assessment (measurement). Describe comparability of assessment methods if there is more than one group | 6-8                |
| Bias                         | 9      | Describe any efforts to address potential sources of bias                                                                                                                            | 6-8                |
| Study size                   | 10     | Explain how the study size was arrived at                                                                                                                                            | 6-8                |
| Quantitative variables       | 11     | Explain how quantitative variables were handled in the analyses. If applicable, describe which groupings were chosen and why                                                         | 6-8                |
| Statistical methods          | 12     | (a) Describe all statistical methods, including those used to control for confounding                                                                                                | 6-8                |
|                              |        | (b) Describe any methods used to examine subgroups and interactions                                                                                                                  | 6-8                |
|                              |        | (c) Explain how missing data were addressed                                                                                                                                          | 6-8                |
|                              |        | (d) If applicable, describe analytical methods taking account of sampling strategy                                                                                                   | 6-8                |
|                              |        | (e) Describe any sensitivity analyses                                                                                                                                                | 6-8                |
| <b>Results</b>               |        |                                                                                                                                                                                      |                    |

|                          |     |                                                                                                                                                                                                              |       |
|--------------------------|-----|--------------------------------------------------------------------------------------------------------------------------------------------------------------------------------------------------------------|-------|
| Participants             | 13* | (a) Report numbers of individuals at each stage of study—eg numbers potentially eligible, examined for eligibility, confirmed eligible, included in the study, completing follow-up, and analysed            | 8-14  |
|                          |     | (b) Give reasons for non-participation at each stage                                                                                                                                                         | 8-14  |
|                          |     | (c) Consider use of a flow diagram                                                                                                                                                                           | 8-14  |
| Descriptive data         | 14* | (a) Give characteristics of study participants (eg demographic, clinical, social) and information on exposures and potential confounders                                                                     | 8-14  |
|                          |     | (b) Indicate number of participants with missing data for each variable of interest                                                                                                                          | 8-14  |
| Outcome data             | 15* | Report numbers of outcome events or summary measures                                                                                                                                                         | 8-14  |
| Main results             | 16  | (a) Give unadjusted estimates and, if applicable, confounder-adjusted estimates and their precision (eg, 95% confidence interval). Make clear which confounders were adjusted for and why they were included | 8-14  |
|                          |     | (b) Report category boundaries when continuous variables were categorized                                                                                                                                    | 8-14  |
|                          |     | (c) If relevant, consider translating estimates of relative risk into absolute risk for a meaningful time period                                                                                             | 8-14  |
| Other analyses           | 17  | Report other analyses done—eg analyses of subgroups and interactions, and sensitivity analyses                                                                                                               | 8-14  |
| <b>Discussion</b>        |     |                                                                                                                                                                                                              |       |
| Key results              | 18  | Summarise key results with reference to study objectives                                                                                                                                                     | 14-16 |
| Limitations              | 19  | Discuss limitations of the study, taking into account sources of potential bias or imprecision. Discuss both direction and magnitude of any potential bias                                                   | 14-16 |
| Interpretation           | 20  | Give a cautious overall interpretation of results considering objectives, limitations, multiplicity of analyses, results from similar studies, and other relevant evidence                                   | 14-16 |
| Generalisability         | 21  | Discuss the generalisability (external validity) of the study results                                                                                                                                        | 14-16 |
| <b>Other information</b> |     |                                                                                                                                                                                                              |       |
| Funding                  | 22  | Give the source of funding and the role of the funders for the present study and, if applicable, for the original study on which the present article is based                                                | 4     |

\*Give information separately for cases and controls in case-control studies and, if applicable, for exposed and unexposed groups in cohort and cross-sectional studies.

**Note:** An Explanation and Elaboration article discusses each checklist item and gives methodological background and published examples of transparent reporting. The STROBE checklist is best used in conjunction with this article (freely available on the Web sites of PLoS Medicine at <http://www.plosmedicine.org/>, Annals of Internal Medicine at <http://www.annals.org/>, and Epidemiology at <http://www.epidem.com/>). Information on the STROBE Initiative is available at [www.strobe-statement.org](http://www.strobe-statement.org).

# BMJ Open

## Secondhand smoke exposure for different education levels: findings from a large, nationally representative survey in Turkey

|                                 |                                                                                                                                                                                                                                 |
|---------------------------------|---------------------------------------------------------------------------------------------------------------------------------------------------------------------------------------------------------------------------------|
| Journal:                        | <i>BMJ Open</i>                                                                                                                                                                                                                 |
| Manuscript ID                   | bmjopen-2021-057360.R1                                                                                                                                                                                                          |
| Article Type:                   | Original research                                                                                                                                                                                                               |
| Date Submitted by the Author:   | 10-Dec-2021                                                                                                                                                                                                                     |
| Complete List of Authors:       | Alkan, Ömer; Ataturk University, Department of Econometrics, Faculty of Economics and Administrative Sciences<br>Ünver, Şeyda; Ataturk University, Department of Econometrics, Faculty of Economics and Administrative Sciences |
| <b>Primary Subject Heading</b>: | Public health                                                                                                                                                                                                                   |
| Secondary Subject Heading:      | Research methods, Smoking and tobacco, Public health, Occupational and environmental medicine, Health policy                                                                                                                    |
| Keywords:                       | Health informatics < BIOTECHNOLOGY & BIOINFORMATICS, PUBLIC HEALTH, STATISTICS & RESEARCH METHODS, EDUCATION & TRAINING (see Medical Education & Training)                                                                      |
|                                 |                                                                                                                                                                                                                                 |

SCHOLARONE™  
Manuscripts



I, the Submitting Author has the right to grant and does grant on behalf of all authors of the Work (as defined in the below author licence), an exclusive licence and/or a non-exclusive licence for contributions from authors who are: i) UK Crown employees; ii) where BMJ has agreed a CC-BY licence shall apply, and/or iii) in accordance with the terms applicable for US Federal Government officers or employees acting as part of their official duties; on a worldwide, perpetual, irrevocable, royalty-free basis to BMJ Publishing Group Ltd ("BMJ") its licensees and where the relevant Journal is co-owned by BMJ to the co-owners of the Journal, to publish the Work in this journal and any other BMJ products and to exploit all rights, as set out in our [licence](#).

The Submitting Author accepts and understands that any supply made under these terms is made by BMJ to the Submitting Author unless you are acting as an employee on behalf of your employer or a postgraduate student of an affiliated institution which is paying any applicable article publishing charge ("APC") for Open Access articles. Where the Submitting Author wishes to make the Work available on an Open Access basis (and intends to pay the relevant APC), the terms of reuse of such Open Access shall be governed by a Creative Commons licence – details of these licences and which [Creative Commons](#) licence will apply to this Work are set out in our licence referred to above.

Other than as permitted in any relevant BMJ Author's Self Archiving Policies, I confirm this Work has not been accepted for publication elsewhere, is not being considered for publication elsewhere and does not duplicate material already published. I confirm all authors consent to publication of this Work and authorise the granting of this licence.

1  
2  
3  
4 **Secondhand smoke exposure for different education levels: findings from a large,**  
5  
6 **nationally representative survey in Turkey**  
7

8 **ÖMER ALKAN\*** : Associate professor, Department of Econometrics, Faculty of Economics  
9 and Administrative Sciences, Ataturk University, 2nd Floor, No: 222, Yakutiye/Erzurum,  
10 Turkey, E-mail address: oalkan@atauni.edu.tr, Gsm: +09 0506 264 62 64, ORCID ID: 0000-  
11  
12  
13  
14  
15 0002-3814-3539  
16

17  
18  
19 **ŞEYDA ÜNVER:** Research assistant, Department of Econometrics, Faculty of Economics  
20 and Administrative Sciences, Ataturk University, 2nd Floor, No: 227, Yakutiye/Erzurum,  
21 Turkey, E-mail address: seyda.unver@atauni.edu.tr, ORCID ID: 0000-0002-2310-4545  
22  
23  
24  
25  
26  
27  
28  
29  
30  
31  
32  
33  
34  
35  
36  
37  
38  
39  
40  
41  
42  
43  
44  
45  
46  
47  
48  
49  
50  
51  
52  
53  
54  
55  
56  
57

---

58  
59 \* Corresponding author. Department of Econometrics, Faculty of Economics and Administrative Sciences,  
60 Ataturk University, Erzurum, TURKEY. e-mail address: oalkan@atauni.edu.tr

## Abstract

**Objectives:** The aim of this study is to determine the factors that influence individuals' exposure to tobacco smoke in Turkey according to their education level.

**Design:** Secondary data analysis.

**Participants:** Altogether, 17,084 individuals aged 15 and over were included in this study.

**Settings:** Dataset of the Turkey Health Survey in 2019.

**Methods:** Binary logistic regression analysis was used to determine the factors associated with individuals' exposure to tobacco smoke.

**Primary and secondary outcome measures:** The variables age, gender, marital status, general health status, employment status, receipt of psycho-social support, and tobacco use were found to be correlated with exposure to tobacco smoke.

**Results:** The study determined that individuals who are illiterate/unschooled were exposed to tobacco smoke at a rate of 32.61%, primary school graduates at a rate of 34.32%, primary education graduates at a rate of 41.75%, high school graduates at a rate of 41.04% and university graduates at a rate of 40.34%.

**Conclusion:** As a result of the study, it is emphasized that men, young individuals, individuals with moderate and very good general health status, those who use tobacco, those who are unemployed and those who receive psycho-social support should be targeted. In addition, appropriate strategies for reducing SHS exposure should be developed, taking into account public health strategies for increasing awareness of the adverse health effects of SHS exposure and the determinants of tobacco exposure according to the study.

**Keywords:** health informatics, public health, statistics & research methods

### Strengths and limitations of this study

- In this study was used data from a nationally representative sample in Turkey.
- Binary logistic regression was conducted to determine the risk factors.
- Survey statistics in Stata 15 were used to account for the complex sampling design and weights.
- This study used secondary data.
- The data for this study was collected through a self-report survey, which may have resulted in reporting bias.

### Acknowledgements

The authors wish to express their gratitude to thank the Turkish Statistical Institute for providing the data. The views and opinions expressed in this manuscript are those of the authors only and do not necessarily represent the views, official policy, or position of the Turkish Statistical Institute.

### Ethics approval

This study was accomplished by using data of the survey titled Turkey Health Survey conducted by Turkey Statistical Institute. Therefore, ethical approval was not required for this study. We used secondary data for this study. In order to use the micro dataset from the Turkey Health Survey, the official permission was obtained from the Turkish Statistical Institute. In addition, a "Letter of Undertaking" was given to the Turkish Statistical Institute for the use of the data subjected to the study.

**Patient and public involvement:** Patients and/or the public were not involved in the design, or conduct, or reporting, or dissemination plans of this research.

**Patient consent for publication:** Not required

### Consent for publication

Not applicable.

### Data availability statement



1  
2  
3 The data underlying this study is subject to third-party restrictions by the Turkey Statistical  
4 Institute. Data are available from the Turkish Statistical Institute (bilgi@tuik.gov.tr) for  
5 researchers who meet the criteria for access to confidential data. The authors of the study did  
6 not receive any special privileges in accessing the data.  
7  
8  
9

### 10 **Competing interests**

11  
12  
13 The authors have no competing interests to report. Additionally, the authors had full access to  
14 all of the data in the study and take responsibility for the integrity of the data and the accuracy  
15 of the data analysis.  
16  
17  
18

### 19 **Funding**

20  
21  
22 This research did not receive any specific grant from funding agencies in the public,  
23 commercial, or not-for-profit sectors.  
24  
25  
26

### 27 **Author Contributions**

28  
29  
30 ÖA conceived and led the design and development of the study proposal. ÖA and ŞÜ supervised  
31 data collection, led the data analysis and drafting the manuscript. ŞÜ made substantial  
32 contributions to the conceptualization and design of the study, data interpretations and writing  
33 the manuscript. All authors read and approved the final version of the manuscript.  
34  
35  
36  
37  
38  
39  
40  
41  
42  
43  
44  
45  
46  
47  
48  
49  
50  
51  
52  
53  
54  
55  
56  
57  
58  
59  
60

## INTRODUCTION

Today, public health is regarded as one of the most important indicators of a person's quality of life. Especially in recent years, public health has risen to prominence as a priority issue in all countries [1]. Tobacco use, a global problem, is the leading preventable cause of death worldwide, with 6 million people dying each year due to tobacco use [2]. Tobacco use has a harmful impact on not only smokers, but also on those exposed to second-hand smoke (SHS) [3].

SHS is a mixture of side stream smoke released into the air by a lit tobacco product (cigarette, pipe or cigar) and mainstream smoke that is breathed back into the air by an active smoker [4]. SHS contains over 7000 chemicals, only about 70 of which are known [5]. Indoor SHS concentrations are dependents on the amount of tobacco smoked over time, the size of the room, the ventilation rate, and other processes that can remove contaminants [6].

Exposure to SHS causes significant health problems that endanger human health worldwide. Exposure to SHS is the third leading preventable cause of death worldwide [7]. Chronic exposure to SHS is at least 80-90% as harmful as chronic active smoking on an average [8]. Each year, over 880,000 people die as a result of exposure to SHS [9]. Individuals exposed to SHS have a 20% - 30% increased risk of in cardiovascular disease compared to those who are not exposed at all [10]. Moreover, a similar increase in lung cancer was reported among individuals exposed to SHS compared to those who were not [3]. Children are also affected by SHS exposure. Children exposed to SHS are at an increased risk of developing acute respiratory infections, auditory dysfunction and exacerbation of asthma [11, 12]. Therefore, exposure to SHS not only causes serious illness, but also imposes an economic and social burden [13].

There is significant evidence that comprehensive smoke-free policies in public spaces are associated with lower tobacco use and SHS, resulting in reduced negative health implications [14-16]. Controlling the prevalence of tobacco products and SHS is a significant global public health challenge. Comprehensive smoke-free legislation is required by Article 8 of the World Health Organization's (WHO) Framework Convention on Tobacco Control (FCTC) to eliminate tobacco use in all indoor public spaces, including workplaces [17]. In 2007, the FCTC's Article 8 was revised. Parties to the FCTC have recommended that smoking be prohibited outdoors or in semi-open areas where appropriate, based on findings of potential health hazards [14].

1  
2  
3 As of the end of 2017, 181 countries have signed the World Health Organization's Framework  
4 Convention on Tobacco Control [18]. However, progress in the fight against secondhand smoke  
5 varies greatly across countries. Less developed countries appear to benefit less from the fight  
6 against secondhand smoke [19]. This could be due to the fact that these countries are new  
7 members of the FCTC. Furthermore, in terms of compliance with the smoking ban, the  
8 execution of agreed smoking prohibitions differs substantially between countries. Failure at the  
9 political economy level, a lack of government resources to implement laws, and a lack of  
10 political will to protect public health all contribute to this [20]. As a result, the level of  
11 enforcement and compliance is regarded as at least as crucial as the implementation of smoke-  
12 free policies, particularly less developed countries [19].

21 Since ratifying the FCTC in 2008, the Russian government has significantly enhanced its  
22 policies addressing smoke-free environments. It prohibits smoking in closed workplaces, closed  
23 public spaces, public transportation, and some open locations (beaches, playgrounds, public  
24 building entrances, and public transportation) [18]. Thailand passed partial smoke-free  
25 legislation in 1992, prohibiting smoking in public locations where such restrictions could be  
26 effectively enforced, such as hospitals, schools, and air-conditioned workplaces [21]. Ghana,  
27 one of the first nations to ratify the FCTC in 2004, prohibited smoking in any closed portion of  
28 a workplace or any other public place that was not designated [22, 23]. Chile implemented  
29 complete nationwide smoke-free legislation in 2013. This legislation prohibits smoking in all  
30 closed and semi-closed spaces of all workplaces and public locations, including the  
31 accommodation sector [24]. In Brazil, the use of cigarettes (and other smoking products derived  
32 from tobacco) was banned in all public areas save areas designated for smoking exclusively,  
33 segregated and ventilated, in 1996 [25]. In 2005, Spain ratified the FCTC. Smoking is forbidden  
34 in all closed public spaces, workplaces, and public transportation vehicles [26]. Peru signed the  
35 FCTC in 2004. Smoking is prohibited in closed public and private buildings (bars, restaurants,  
36 movie theaters and government buildings), as well as on public transportation [27]. In Australia,  
37 smoking is prohibited in closed public places under the 2003 Smoke-Free Public Places Act  
38 (ACT) [28]. In 2004, Toronto and its neighboring municipalities prohibited smoking indoors,  
39 including bars and casinos. In 2006, the Province of Ontario enacted a similar Smoke-Free  
40 Ontario Act [29].

56 There are studies examining the effect of smoking bans in public areas on exposure to SHS. Air  
57 quality measurements in bars and cafes before and after smoke-free workplace laws revealed  
58 considerable post-legal decreases in fine particle air pollution. Furthermore, it has been  
59  
60

1  
2  
3 discovered that reductions in SHS exposure as a result of smoke-free policies improve  
4 respiratory health among bar and cafe workers [30]. A study conducted in Spain, which ratified  
5 the FCTC in 2005, discovered that, beginning in January 2006, a comprehensive ban on outdoor  
6 smoking in workplaces and a partial ban in restaurants were enforced, resulting in a reduction  
7 in workplace exposure to SHS from 40% to 9.0% [31]. In a study conducted in Mexico, which  
8 approved the FCTC in 2005, non-smoking spaces were established in public places and  
9 workplaces as part of the 2008 smoking ban. The study found that SCC exposure in closed  
10 workplaces dropped considerably compared to the previous month [32]. According to a study  
11 conducted in India, which approved the FCTC in 2005, despite the smoking prohibition in  
12 public places, 36% of the restaurants are still not smoke-free, with hookah restaurants providing  
13 the largest exposure to tobacco smoke [33].

14  
15  
16  
17  
18  
19  
20  
21  
22  
23 There are additional studies examining the impact of smoke-free policies on tobacco usage  
24 prevalence. According to a study conducted in Norway, which approved the FCTC in 2005,  
25 there was a 6.8% decline in smoking among employees in the workplace after a smoking ban  
26 was implemented in indoor areas in June 2004 [34]. In a study conducted in Canada, which  
27 approved the FCTC in 2005, it was discovered that after the introduction of a comprehensive  
28 smoking prohibition policy in 2004, the prevalence of tobacco usage declined from 24.1% in  
29 2003 to 18.2% in 2005 [35]. According to a study conducted in Italy, which approved the FCTC  
30 in 2008, the prevalence of tobacco use among all adults decreased by 7.3% before and after the  
31 approval of the comprehensive smoke-free law and the implementation of the no-smoking  
32 policy in public places [36]. According to a study conducted in Spain, which approved the  
33 FCTC in 2005, the number of smokers decreased by 2.3% after the smoking ban legislation was  
34 implemented in public places and workplaces [37]. According to a study conducted in Ireland,  
35 which approved the FCTC in 2006, there was a 4.7% decline in smoking among bar staff after  
36 the public smoking ban compared to the pre-ban period [38].

37  
38  
39  
40  
41  
42  
43  
44  
45  
46  
47  
48 Turkey ratified the FCTC in 2004 [39]. In order to establish a smoke-free Turkey and protect  
49 passive smokers, on May 19, 2008, the goal of the “Smoke-Free Air Zone” campaign was to  
50 prohibit cigarette consumption in all indoor areas (except restaurants, bars, cafes) [40]. On July  
51 19, 2009, the ban was expanded to include restaurants, coffee houses, bars and cafes, ensuring  
52 that all indoor areas in Turkey are smoke-free. By prohibiting smoking indoor, the frequency  
53 of both active and passive smoking has been reduced. There was a significant reduction in the  
54 prevalence of second-hand smoke in all indoor public areas, with the greatest reduction  
55 occurring in restaurants (55.9% in 2008, 12.9% in 2012). Although it is not covered by the law,  
56  
57  
58  
59  
60

1  
2  
3 there has been a significant reduction in the prevalence of second-hand smoke in households.  
4 Moreover, as of 19 July 2009, Turkey was ranked sixth in the world and the third in Europe in  
5 terms of having the most comprehensive tobacco control legislation, behind Bermuda, New  
6 Zealand, Uruguay, England and Ireland, according to WHO data [41].  
7  
8  
9

10 While, active smoking is a voluntary behavior, however, exposure to SHS occurs passively and  
11 can affect nonsmokers as well. Therefore, in order to properly address SHS exposure, it is  
12 critical to identify the factors that contribute to the exposure [13]. While the demographic,  
13 socioeconomic and psychosocial determinants of tobacco use have received considerable  
14 attention in the literature, research focusing on SHS determinants is scarce [13, 42, 43].  
15  
16  
17  
18  
19

20 Education is frequently considered the key indication of individual socio-economic status (SES)  
21 and is one of the core determinants of health [44, 45]. Occupation, income, and education are  
22 the key indices of SES, which is a multidimensional concept. In the literature, many researchers  
23 have preferred education as the primary indicator of SES. Earnings and occupational position  
24 may fluctuate with changes in health because educational attainment tends to stable in early  
25 adulthood. Furthermore, whereas educational status may be determined for everyone,  
26 occupational status cannot be determined for those who have recently entered or never entered  
27 the labor [46].  
28  
29  
30  
31  
32  
33  
34

35 Material, behavioral, and cognitive theories about the relationship of SES to health and death  
36 are all linked to educational attainment [47]. The relationship between education and health is  
37 well-established, with better-educated people living longer and experiencing fewer ailments  
38 throughout their lives. Individuals' income-earning abilities are directly influenced by their  
39 educational attainment, and thus their access to adequate nutrition, shelter, health care, and  
40 other material conditions that can help them live a long and healthy life. Education can also  
41 improve one's capacity to use information to make better judgments that will improve one's  
42 prospects in life [44, 48]. A protective impact of educational attainment against drug use and  
43 SHS exposure, including alcohol use and binge drinking, has been observed in the literature  
44 [49, 50]. As a result, research have been conducted in a variety of disciplines, including health  
45 [51-53], education [54-56], and the arts [57, 58]. Furthermore, there are studies in different  
46 fields of social sciences in which educational differences are discussed [59-61].  
47  
48  
49  
50  
51  
52  
53  
54  
55  
56

57 In Turkey, little is known about the extent to which individuals with varying levels of education  
58 are exposed to tobacco smoke. As far as we know, this is the first study in Turkey to examine  
59  
60

1  
2  
3 the factors associated with exposure to tobacco smoke according to an individual's educational  
4 level. The following constitute this study's research problems; Does the exposure to smoke vary  
5 according to an individual's educational level?, Is there a relationship between an individual's  
6 demographic characteristics and their exposure to tobacco smoke?, and Are the factors  
7 associated with the exposure of tobacco smoke for the individuals with varying educational  
8 levels the same?  
9  
10  
11  
12

## 13 14 **LITERATURE REVIEW**

15  
16  
17 Various studies on SHS exposure have been undertaken in various countries, in various fields,  
18 on various samples, and in various years. According to a Korean study, SHS exposure was  
19 associated to frequent alcohol use in young women and long-term cigarette use in men [62]. A  
20 Spanish study found that all SHS exposure indicators were moderately strongly correlated with  
21 nicotine concentrations in the air [63]. A Portuguese study examined the short-term  
22 effectiveness of a 100% smoke-free homes intervention program in avoiding passive tobacco  
23 smoke exposure in children [64]. SHS concentrations in the living room and children's  
24 bedrooms in houses with children younger than 13 years old were found to be strongly  
25 correlated in a study conducted in Barcelona [65]. According to a Chilean study, workers in  
26 smoking facilities were exposed to more SHS than those in non-smoking areas [66]. In a study  
27 conducted in Bangladesh, children aged 10-12 years were found to be exposed to SHS at home  
28 [67]. In a study conducted in China, households exposed to SHS had a higher prevalence of  
29 gifting and sharing smokes [68]. SHS exposure was reported to be common among preschool  
30 children and their mothers (50% and 7%, respectively) in a study conducted in Taiwan [69]. In  
31 a study conducted in India, it was aimed to address factors associated with current tobacco use  
32 (CTU) and SHS exposure among older adults ( $\geq 60$  years) [70]. According to a study conducted  
33 in Ireland, pregnant women who lived with a smoker were approximately four times more likely  
34 to be exposed to SHS [71].  
35  
36  
37  
38  
39  
40  
41  
42  
43  
44  
45  
46  
47  
48

49 The variables connected to education (education level, education difference, educational  
50 achievement, etc.) come to the fore in empirical studies on SHS exposure in the literature. In  
51 their study, Assari and Bazargan [49] found that persons with a higher degree were less likely  
52 to be exposed to daily SHS. All categories of the variable of educational status were found to  
53 be efficient in exposing women to SHS in a study conducted in Turkey [7]. A study among US  
54 adults indicated that those with less education were more likely to be exposed to SHS at work  
55 [72]. According to a study conducted in South Korea, the likelihood of being exposed to SHS  
56  
57  
58  
59  
60

1  
2  
3 decreases as one's educational level rises [73]. A study conducted in Bangladesh to determine  
4 the incidence of SHS exposure at home discovered that education had a significant impact on  
5 SHS exposure at home [74]. According to a study conducted in Australia, the higher one's  
6 educational level, the less likely one is to be exposed to SHS at home and elsewhere [75]. Less  
7 educated people were shown to be more susceptible to SHS in a study conducted in Germany  
8 [76]. According to a study conducted in Spain, children whose parents have basic and secondary  
9 education have higher overall SHS exposure than children whose parents have a university  
10 degree [77]. In a study of non-smoking adult cancer survivors in the United States, it was found  
11 that less educated individuals were more exposed to SHS [78].  
12  
13  
14  
15  
16  
17  
18  
19

20 In the literature, there are various studies examining the relationship between SHS exposure  
21 and education. According to a study conducted in Northern China's Inner Mongolia (Inner  
22 Mongolia, Northern China), SHS exposure rates were highest among young women who had  
23 never smoked [79]. In another study conducted in Portugal, it was found that smoking  
24 prevalence was higher among parents with lower levels of education, and that children of  
25 parents with lower levels of education were more likely to be exposed to SHS at home [80].  
26 According to a study conducted in Spain, 25.8% of children are exposed to SHS at home, 4.6%  
27 in the automobile, 8.2% on public transportation, 31.9% in kindergarten, and 48% in their free  
28 time. The study also discovered that the higher the education level at home, the lower the  
29 exposure to SHS [77]. SHS exposure was found to be relatively high in a study of women with  
30 higher education at two Jordanian institutions [81]. In a study of American adults, it was  
31 discovered that educational attainment helped individuals avoid environmental risk factors such  
32 as secondhand smoke, with Blacks and Hispanics having less protective effects against SHS  
33 exposure than Whites [49].  
34  
35  
36  
37  
38  
39  
40  
41  
42  
43  
44

## 45 **METHODS**

### 46 **Data**

47  
48  
49  
50 The survey data for this study, survey data obtained from the Turkish Statistical Institute's 2019  
51 Turkey Health Survey. Turkey Health Survey was conducted with the aim of closing the  
52 information gap in the current structure by obtaining data on health indicators, which account  
53 for a significant portion of the development indicators used to determine a country's  
54 development level. The research is significant as it is the first to reflect the country's overall  
55  
56  
57  
58  
59  
60

1  
2  
3 situation and to enable international comparisons while also shedding light on national  
4 requirements [82].  
5  
6

7  
8 The stratified two-stage cluster sampling method was used to obtain the data. The first stage  
9 sampling unit is comprised of randomly selected blocks from clusters (blocks) containing an  
10 average of 100 house addresses proportional to their size; the second sampling unit is comprised  
11 of randomly selected household addresses from each selected cluster. The research was  
12 conducted in order to provide an overall estimate for Turkey [82].  
13  
14  
15  
16

17  
18 Secondary data of individuals aged 15 years and over were employed in the study. The total  
19 sample volume has been determined to be 9,470 household addresses due to the study's design.  
20 From these households, data were gathered from a total of 17,084 people.  
21  
22

### 23 **Outcome Variables**

24  
25  
26 The dependent variable in this study is individuals' exposure to tobacco smoke according to  
27 their educational level (illiterate/unschooled, primary school graduates, primary education  
28 graduates, high school graduates, university graduates).  
29  
30  
31

32  
33 This research looked at five different groups, ranging from the least educated to the most  
34 educated. Studies investigating educational differences in various fields in the literature were  
35 considered to determine the education categories [49, 50, 52, 56, 83, 84]. In the study, a separate  
36 binary logit model was estimated for each education level. Individuals enrolled in the study  
37 were assigned the code "1" if they had been exposed to tobacco smoke and "0" if they had not.  
38  
39  
40  
41

### 42 **Independent variables**

43  
44  
45 This study's independent variables are those that are available in the Turkey Health Survey and  
46 emerge as a result of the literature review. The independent variables of this study are as  
47 follows; age (34 and under, 35–44, 45–54 and 55+), gender (male, female), marital status (never  
48 married, married, divorced/spouse died), employment status (yes, no), general health status  
49 (very good/good, moderate, poor/very bad), receipt of psycho-social support health services  
50 from primary care health institutions (yes, no), alcohol use (yes, no), tobacco use status (yes,  
51 no), and the ability to afford treatment (yes, no).  
52  
53  
54  
55  
56

57  
58 In this study, the age variable was included in the model as a qualitative variable. The inclusion  
59 of age as a qualitative variable in the model allows for a more detailed examination of its  
60



1  
2  
3 variation across age groups. [85, 86]. Most people complete their education at an early age and  
4 continue it throughout their adult lives [87]. Therefore, 34 and under is considered as a category.  
5  
6 In order to avoid the multicollinearity problem in the models, 55 and above are considered as a  
7  
8 category.  
9

10  
11 Ordinal and nominal variables were defined as dummy variables to examine the effects of all  
12  
13 variables included in the binary logistic regression model on their categories [88].  
14

### 15 **Analysis method**

16  
17  
18 Survey statistics in Stata 15 (Stata Corporation) were used to account for the complex sampling  
19  
20 design and weights. Weighted analysis was conducted [89]. The primary objective was to  
21  
22 ascertain, the tobacco exposure of the participants in the research, as well as the frequency and  
23  
24 percentages of the independent variables. In this study, the binary logistic regression method  
25  
26 was used to investigate differences in tobacco exposure by educational level.  
27

28  
29 Binary logistic regression was conducted to determine the risk factors associated with tobacco  
30  
31 smoke exposure. In cases where the result (dependent) variable has two options  
32  
33 (binary/dichotomy), this analysis is used to investigate the relationship between the dependent  
34  
35 variable and the independent variable(s). Binary logistic regression not only enables the  
36  
37 statistical significance of each independent variable as a risk factor to be evaluated, but also  
38  
39 odds ratio to be calculated [90].  
40

### 41 **Patient and public involvement**

42  
43 Patients and/or the public were not involved in the design, or conduct, or reporting, or  
44  
45 dissemination plans of this research.  
46

## 47 **RESULTS**

### 48 **Descriptive statistics**

49  
50  
51 This study determined that individuals who are illiterate/unschooled were exposed to tobacco  
52  
53 smoke at a rate of 32.61%, primary school graduates at a rate of 34.32%, primary education  
54  
55 graduates at a rate of 41.75%, high school graduates at a rate of 41.04%, and university  
56  
57 graduates at a rate of 40.34%.  
58  
59  
60

Table 1 summarizes the findings regarding the factors that influence an individual's exposure to tobacco smoke based on their education level in Turkey.

**Table 1.** Findings regarding factors affecting individuals' exposure to tobacco smoke by education level

| Variables                    | Entire Model<br>f (%) | Model 1<br>f (%) | Model 2<br>f (%) | Model 3<br>f (%) | Model 4<br>f (%) | Model 5<br>f (%) |
|------------------------------|-----------------------|------------------|------------------|------------------|------------------|------------------|
| <b>Age</b>                   |                       |                  |                  |                  |                  |                  |
| 34 and under                 | 5800<br>(33.9)        | 271<br>(12.4)    | 477<br>(8.5)     | 1929<br>(65.1)   | 1586<br>(48.9)   | 1537<br>(50.1)   |
| 35-44                        | 3395<br>(19.9)        | 212<br>(9.7)     | 1238<br>(22.1)   | 410<br>(13.8)    | 780<br>(24.0)    | 755<br>(24.6)    |
| 45-54                        | 2918<br>(17.1)        | 301<br>(13.7)    | 1527<br>(27.2)   | 320<br>(10.8)    | 402<br>(12.4)    | 368<br>(12.0)    |
| 55 +                         | 4971<br>(19.1)        | 1410<br>(64.3)   | 2370<br>(42.2)   | 306<br>(10.3)    | 478<br>(14.7)    | 407<br>(13.3)    |
| <b>Gender</b>                |                       |                  |                  |                  |                  |                  |
| Male                         | 7784<br>(45.6)        | 392<br>(17.9)    | 2508<br>(44.7)   | 1595<br>(53.8)   | 1711<br>(52.7)   | 1578<br>(51.5)   |
| Female                       | 9300<br>(54.4)        | 1802<br>(82.1)   | 3104<br>(55.3)   | 1370<br>(46.2)   | 1535<br>(47.3)   | 1489<br>(48.5)   |
| <b>Marital status</b>        |                       |                  |                  |                  |                  |                  |
| Never married                | 3610<br>(21.1)        | 111<br>(5.1)     | 245<br>(4.4)     | 1263<br>(42.6)   | 1081<br>(33.3)   | 910<br>(29.7)    |
| Married                      | 11726<br>(68.6)       | 1471<br>(67.0)   | 4712<br>(84.0)   | 1579<br>(53.3)   | 1979<br>(61.0)   | 1985<br>(64.7)   |
| Divorced/Spouse died         | 1748<br>(10.2)        | 612<br>(27.9)    | 655<br>(11.7)    | 123<br>(4.1)     | 186<br>(5.7)     | 172<br>(5.6)     |
| <b>General health status</b> |                       |                  |                  |                  |                  |                  |
| Very good/good               | 9988<br>(58.5)        | 580<br>(26.4)    | 2514<br>(44.8)   | 2129<br>(71.8)   | 2381<br>(73.4)   | 2384<br>(77.7)   |
| Moderate                     | 5214<br>(30.5)        | 870<br>(39.7)    | 2312<br>(41.2)   | 697<br>(23.5)    | 734<br>(22.6)    | 601<br>(19.6)    |
| Poor/Very bad                | 1882<br>(11.0)        | 744<br>(33.9)    | 786<br>(14.0)    | 139<br>(4.7)     | 131<br>(4.0)     | 82<br>(2.7)      |
| <b>Employment status</b>     |                       |                  |                  |                  |                  |                  |
| No                           | 10557<br>(61.8)       | 1913<br>(87.2)   | 3763<br>(67.1)   | 1905<br>(64.2)   | 1873<br>(57.7)   | 1103<br>(36.0)   |
| Yes                          | 6527<br>(38.2)        | 281<br>(12.8)    | 1849<br>(32.9)   | 1060<br>(35.8)   | 1373<br>(42.3)   | 1964<br>(64.0)   |
| <b>Alcohol use</b>           |                       |                  |                  |                  |                  |                  |
| No                           | 14357<br>(85.1)       | 2171<br>(99.0)   | 5042<br>(89.8)   | 2558<br>(86.3)   | 2575<br>(79.3)   | 2191<br>(71.4)   |
| Yes                          | 2547<br>(14.9)        | 23<br>(1.0)      | 570<br>(10.2)    | 407<br>(13.7)    | 671<br>(20.7)    | 876<br>(28.6)    |
| <b>Psycho-social support</b> |                       |                  |                  |                  |                  |                  |
| No                           | 15955<br>(93.4)       | 2057<br>(93.8)   | 5200<br>(92.7)   | 2809<br>(94.7)   | 3033<br>(93.4)   | 2856<br>(93.1)   |
| Yes                          | 1129<br>(6.6)         | 137<br>(6.2)     | 412<br>(7.3)     | 156<br>(5.3)     | 213<br>(6.6)     | 211<br>(6.9)     |
| <b>Tobacco use</b>           |                       |                  |                  |                  |                  |                  |
| No                           | 11853<br>(69.4)       | 1881<br>(85.7)   | 3924<br>(69.9)   | 1968<br>(66.4)   | 1984<br>(61.1)   | 2096<br>(68.3)   |
| Yes                          | 5231<br>(30.6)        | 313<br>(14.3)    | 1688<br>(30.1)   | 997<br>(33.6)    | 1262<br>(38.9)   | 971<br>(31.7)    |

| <b>Ability to afford treatment</b>     |                 |                |                |                |                |                |
|----------------------------------------|-----------------|----------------|----------------|----------------|----------------|----------------|
| <b>No</b>                              | 1349<br>(7.9)   | 172<br>(7.8)   | 405<br>(7.2)   | 309<br>(10.4)  | 250<br>(7.7)   | 213<br>(6.9)   |
| <b>Yes</b>                             | 15735<br>(92.1) | 2022<br>(92.2) | 5207<br>(92.8) | 2656<br>(89.6) | 2996<br>(92.3) | 2854<br>(93.1) |
| <b>Education</b>                       |                 |                |                |                |                |                |
| <b>Illiterate/<br/>Unschool</b>        | 2194<br>(12.8)  | N/A            | N/A            | N/A            | N/A            | N/A            |
| <b>Primary school<br/>graduates</b>    | 5612<br>(32.8)  | N/A            | N/A            | N/A            | N/A            | N/A            |
| <b>Primary education<br/>graduates</b> | 2965<br>(17.4)  | N/A            | N/A            | N/A            | N/A            | N/A            |
| <b>High school<br/>graduates</b>       | 3246<br>(19.0)  | N/A            | N/A            | N/A            | N/A            | N/A            |
| <b>University graduates</b>            | 3067<br>(18.0)  | N/A            | N/A            | N/A            | N/A            | N/A            |

Model 1: Illiterate/ unschooled, Model 2: Primary school graduates, Model 3: Primary education graduates, Model 4: High school graduates; Model 5: University graduates

## Model estimation

In the study, it was tested whether there was a multicollinearity between the independent variables to be included in the binary logistic regression model. It is thought that those with a variance inflation factor (VIF) values of 5 or greater exhibit moderate multicollinearity, while those of 10 or greater exhibit a high degree of multicollinearity [59]. There is no variable in this study that causes the problem of multicollinearity between the variables (Appendix 1).

The estimated binary logistic regression model's results are given in Table 2. The entire model estimated for all participants revealed a correlation between education level and exposure to tobacco smoke. According to Table 2, the variables age (55+), marital status (never married) and tobacco use were all found to be significant in Model 1, which was estimated for illiterate/unschooled individuals. Age, marital status (divorced/spouse died), general health status (moderate), receiving psycho-social support and tobacco use were all significant variables in Model 2, which was estimated for primary school graduates. Age, gender, general health status (moderate), employment status and tobacco use were all significant variables in Model 3, which was estimated for primary education graduates. The variables age (45-54, 55+), gender, marital status (never married), general health status (moderate), and tobacco use were found to be significant in Model 4, which was estimated for high school graduates. Finally, it was observed that the variables of age, gender, marital status (never married) and tobacco use were significant in Model 5, which was estimated for university graduates.

**Table 2.** Estimated model results for factors affecting individuals' exposure to tobacco smoke by education level

| Variables                                                         | Entire Model                   | Model 1                        | Model 2                        | Model 3                        | Model 4                        | Model 5                        |
|-------------------------------------------------------------------|--------------------------------|--------------------------------|--------------------------------|--------------------------------|--------------------------------|--------------------------------|
|                                                                   | $\beta$                        | $\beta$                        | $\beta$                        | $\beta$                        | $\beta$                        | $\beta$                        |
| <b>Age (reference category: 34 and under)</b>                     |                                |                                |                                |                                |                                |                                |
| 35-44                                                             | -0.279 <sup>a</sup><br>(0.059) | -0.302<br>(0.230)              | -0.239 <sup>c</sup><br>(0.132) | -0.400 <sup>a</sup><br>(0.148) | -0.120<br>(0.122)              | -0.365 <sup>a</sup><br>(0.112) |
| 45-54                                                             | -0.388 <sup>a</sup><br>(0.065) | -0.449<br>(0.224)              | -0.334 <sup>b</sup><br>(0.131) | -0.523 <sup>a</sup><br>(0.159) | -0.418 <sup>a</sup><br>(0.154) | -0.408 <sup>a</sup><br>(0.145) |
| 55 +                                                              | -0.919 <sup>a</sup><br>(0.069) | -1.455 <sup>a</sup><br>(0.205) | -0.744 <sup>a</sup><br>(0.135) | -0.874 <sup>a</sup><br>(0.183) | -0.502 <sup>a</sup><br>(0.159) | -0.836 <sup>a</sup><br>(0.161) |
| <b>Gender (reference category: male)</b>                          |                                |                                |                                |                                |                                |                                |
| Female                                                            | -0.245 <sup>a</sup><br>(0.044) | -0.197<br>(0.170)              | -0.087<br>(0.081)              | -0.421 <sup>a</sup><br>(0.105) | -0.249 <sup>a</sup><br>(0.096) | -0.263 <sup>a</sup><br>(0.092) |
| <b>Marital status (reference category: married)</b>               |                                |                                |                                |                                |                                |                                |
| Never married                                                     | 0.263 <sup>a</sup><br>(0.056)  | -0.552 <sup>b</sup><br>(0.263) | 0.240<br>(0.160)               | 0.051<br>(0.113)               | 0.466 <sup>a</sup><br>(0.113)  | 0.451 <sup>a</sup><br>(0.102)  |
| Divorced/Spouse died                                              | -0.129 <sup>c</sup><br>(0.072) | -0.077<br>(0.158)              | -0.289 <sup>b</sup><br>(0.115) | 0.321<br>(0.232)               | 0.067<br>(0.199)               | 0.076<br>(0.199)               |
| <b>General health status (reference category: very good/good)</b> |                                |                                |                                |                                |                                |                                |
| Moderate                                                          | 0.128 <sup>a</sup><br>(0.046)  | -0.128<br>(0.152)              | 0.178 <sup>a</sup><br>(0.077)  | 0.282 <sup>b</sup><br>(0.112)  | 0.184 <sup>c</sup><br>(0.104)  | -0.084<br>(0.114)              |
| Poor/Very bad                                                     | 0.100<br>(0.073)               | 0.036<br>(0.160)               | 0.182<br>(0.113)               | 0.153<br>(0.209)               | -0.035<br>(0.228)              | -0.110<br>(0.298)              |
| <b>Employment status (reference category: no)</b>                 |                                |                                |                                |                                |                                |                                |
| Yes                                                               | -0.035<br>(0.046)              | -0.01<br>(0.177)               | 0.102<br>(0.084)               | -0.227 <sup>b</sup><br>(0.108) | -0.099<br>(0.100)              | 0.123<br>(0.103)               |
| <b>Alcohol use (reference category: no)</b>                       |                                |                                |                                |                                |                                |                                |
| Yes                                                               | 0.038<br>(0.055)               | -0.807<br>(0.583)              | 0.150<br>(0.115)               | -0.060<br>(0.134)              | 0.122<br>(0.105)               | 0.002<br>(0.096)               |
| <b>Psycho-social support (reference category: no)</b>             |                                |                                |                                |                                |                                |                                |
| Yes                                                               | 0.140 <sup>c</sup><br>(0.077)  | -0.286<br>(0.249)              | 0.228 <sup>c</sup><br>(0.132)  | 0.283<br>(0.196)               | 0.143<br>(0.173)               | 0.011<br>(0.169)               |
| <b>Tobacco use (reference category: no)</b>                       |                                |                                |                                |                                |                                |                                |
| Yes                                                               | 0.837 <sup>a</sup><br>(0.043)  | 1.312 <sup>a</sup><br>(0.173)  | 1.019 <sup>a</sup><br>(0.078)  | 0.990 <sup>a</sup><br>(0.105)  | 0.526 <sup>a</sup><br>(0.092)  | 0.570 <sup>a</sup><br>(0.093)  |
| <b>Ability to afford treatment (reference category: no)</b>       |                                |                                |                                |                                |                                |                                |
| Yes                                                               | 0.036<br>(0.070)               | -0.163<br>(0.214)              | 0.177<br>(0.130)               | 0.005<br>(0.146)               | 0.216<br>(0.166)               | -0.146<br>(0.171)              |
| <b>Education (reference category: illiterate/unschooled)</b>      |                                |                                |                                |                                |                                |                                |
| Primary school graduates                                          | -0.255 <sup>a</sup><br>(0.068) | N/A                            | N/A                            | N/A                            | N/A                            | N/A                            |
| Primary education graduates                                       | -0.405 <sup>a</sup><br>(0.081) | N/A                            | N/A                            | N/A                            | N/A                            | N/A                            |
| High school graduates                                             | -0.389 <sup>a</sup><br>(0.079) | N/A                            | N/A                            | N/A                            | N/A                            | N/A                            |
| University graduates                                              | -0.364 <sup>a</sup><br>(0.080) | N/A                            | N/A                            | N/A                            | N/A                            | N/A                            |
| Constant                                                          | -0.163<br>(0.108)              | 0.383<br>(0.296)               | -0.865 <sup>a</sup><br>(0.179) | -0.365 <sup>b</sup><br>(0.182) | -0.754 <sup>a</sup><br>(0.200) | -0.372 <sup>b</sup><br>(0.188) |

<sup>a</sup>p<.01; <sup>b</sup>p<.05; <sup>c</sup>p<.10

Model 1: Illiterate/unschooled, Model 2: Primary school graduates, Model 3: Primary education graduates, Model 4: High school graduates; Model 5: University graduates

Table 3 summarizes the marginal effects of factors related to tobacco smoke exposure according to education levels are given in Table 3.

1  
2  
3 When it comes to illiterate/unschooled individuals, those aged 45-54 is 23.3% less likely to be  
4 exposed to tobacco smoke than those aged 34 and under (reference group). Similarly, an  
5 illiterate person aged 55 or over is 91.6% less likely to be exposed to tobacco smoke than  
6 someone aged 34 or under. When the marital status variable is examined, it is discovered that  
7 an illiterate individual who has never been married is 39.3% less likely than a married individual  
8 to be exposed to tobacco smoke. A tobacco user who is illiterate is 76.1% more likely to be  
9 exposed to tobacco smoke than a non-user.

10  
11  
12 Among primary school graduates, an individual aged 35-44 is 14.2% less likely to be exposed  
13 to tobacco smoke than an individual aged 34 or under (reference group). Similarly, a primary  
14 school graduate aged 55 or over is 48.1% less likely to be exposed to tobacco smoke than an  
15 individual aged 34 or under. When the marital status variable is examined, it is discovered that  
16 a primary school graduate with a marital status of divorced/spouse died is 19.8% less likely to  
17 be exposed to tobacco smoke than a married individual. A primary school graduate with a  
18 moderate general health status is 11.7% more likely to be exposed to tobacco smoke than an  
19 individual with a very good/good general health status. Similarly, a primary school graduate  
20 receiving psycho-social support is 14.5% more likely to be exposed to tobacco smoke than  
21 those who do not receive psycho-social support. A primary school graduate who uses tobacco  
22 products is 63.4% more likely to be exposed to tobacco smoke than an individual who does not.

23  
24  
25 Among primary education graduates, an individual aged 35-44 is 23.6% less likely to be  
26 exposed to tobacco smoke than an individual aged 34 or under (reference group). Similarly, a  
27 primary education graduate aged 55 or over is 56% less likely to be exposed to tobacco smoke  
28 than an individual aged 34 or under. A woman who is a primary education graduate is 24.8%  
29 less likely to be exposed to tobacco smoke than a man of the same education level. It was  
30 discovered that the probability of being exposed to tobacco smoke is 16% higher for a primary  
31 education graduate with a moderate general health status than an individual with a very  
32 good/good general health status. An employed individual with a primary education degree is  
33 13.4% less likely to be exposed to tobacco smoke than an unemployed individual. It was  
34 discovered that a primary education graduate who uses tobacco products is 53.9% more likely  
35 to be exposed to tobacco smoke than an individual who does not.

36  
37  
38 Among high school graduates, an individual in the 45-54 age range is 25.4% less likely to be  
39 exposed to tobacco smoke than an individual aged 34 or under (reference group) and an  
40 individual aged 55 or over is 31% less likely to be exposed to tobacco smoke than an individual  
41  
42  
43  
44  
45  
46  
47  
48  
49  
50  
51  
52  
53  
54  
55  
56  
57  
58  
59  
60

aged 34 or under. An unmarried high school graduate is 27.1% more likely to be exposed to tobacco smoke than a married individual. It was discovered that a high school graduate with a moderate general health status is 10.6% more likely to be exposed to tobacco smoke than an individual with a very good/good general health condition. It is seen that a high school graduate who uses tobacco products is 30.3% more likely to be exposed to tobacco smoke than an individual who does not.

When university graduates are considered, an individual aged 45-54 is 21.6% less likely to be exposed to tobacco smoke than an individual aged 34 or under (reference group) and an individual aged 55 or over is 54% less likely to be exposed to tobacco smoke than an individual aged 34 or under. The findings demonstrate that a university graduate who has never been married is 26.4% more likely to be exposed to tobacco smoke than a married individual. A female university graduate is 15.8% less likely to be exposed to tobacco smoke than a man of the same education level. It was also observed that a university graduate who uses tobacco products is 32.7% more likely to be exposed to tobacco smoke than an individual who does not.

**Table 3.** Marginal effects of factors associated with individuals' exposure to tobacco smoke by education level

| Variables                                                         | Entire Model                   | Model 1                        | Model 2                        | Model 3                        | Model 4                        | Model 5                        |
|-------------------------------------------------------------------|--------------------------------|--------------------------------|--------------------------------|--------------------------------|--------------------------------|--------------------------------|
|                                                                   | ME                             | ME                             | ME                             | ME                             | ME                             | ME                             |
| <b>Age (reference category: 34 and under)</b>                     |                                |                                |                                |                                |                                |                                |
| 35-44                                                             | -0.161 <sup>a</sup><br>(0.345) | -0.151<br>(0.116)              | -0.142 <sup>c</sup><br>(0.076) | -0.236 <sup>b</sup><br>(0.091) | -0.069<br>(0.070)              | -0.216 <sup>a</sup><br>(0.069) |
| 45-54                                                             | -0.229 <sup>a</sup><br>(0.392) | -0.233 <sup>b</sup><br>(0.115) | -0.201 <sup>a</sup><br>(0.076) | -0.315 <sup>a</sup><br>(0.102) | -0.254 <sup>a</sup><br>(0.098) | -0.244 <sup>a</sup><br>(0.091) |
| 55 +                                                              | -0.596 <sup>a</sup><br>(0.046) | -0.916 <sup>a</sup><br>(0.112) | -0.481 <sup>a</sup><br>(0.082) | -0.560 <sup>a</sup><br>(0.128) | -0.310 <sup>a</sup><br>(0.103) | -0.540 <sup>a</sup><br>(0.113) |
| <b>Gender (reference category: male)</b>                          |                                |                                |                                |                                |                                |                                |
| Female                                                            | -0.152 <sup>a</sup><br>(0.027) | -0.131<br>(0.111)              | -0.057<br>(0.053)              | -0.248 <sup>a</sup><br>(0.063) | -0.148<br>(0.057)              | -0.158 <sup>a</sup><br>(0.055) |
| <b>Marital status (reference category: married)</b>               |                                |                                |                                |                                |                                |                                |
| Never married                                                     | 0.159 <sup>a</sup><br>(0.033)  | -0.393 <sup>b</sup><br>(0.198) | 0.151<br>(0.097)               | 0.030<br>(0.066)               | 0.271 <sup>a</sup><br>(0.064)  | 0.264 <sup>a</sup><br>(0.058)  |
| Divorced/Spouse died                                              | -0.084 <sup>c</sup><br>(0.047) | -0.052<br>(0.107)              | -0.198 <sup>b</sup><br>(0.081) | 0.178<br>(0.121)               | 0.042<br>(0.123)               | 0.048<br>(0.124)               |
| <b>General health status (reference category: very good/good)</b> |                                |                                |                                |                                |                                |                                |
| Moderate                                                          | 0.079 <sup>a</sup><br>(0.028)  | -0.087<br>(0.103)              | 0.117 <sup>b</sup><br>(0.051)  | 0.160 <sup>a</sup><br>(0.061)  | 0.106 <sup>c</sup><br>(0.059)  | -0.051<br>(0.069)              |
| Poor/Very bad                                                     | 0.062<br>(0.045)               | 0.024<br>(0.106)               | 0.120<br>(0.073)               | 0.089<br>(0.118)               | -0.021<br>(0.138)              | -0.066<br>(0.184)              |
| <b>Employment status (reference category: no)</b>                 |                                |                                |                                |                                |                                |                                |
| Yes                                                               | -0.022<br>(0.029)              | -0.007<br>(0.119)              | 0.067<br>(0.055)               | -0.134 <sup>b</sup><br>(0.065) | -0.058<br>(0.059)              | 0.074<br>(0.062)               |
| <b>Tobacco use (reference category: no)</b>                       |                                |                                |                                |                                |                                |                                |

|                                                              |                                |                               |                               |                               |                               |                               |
|--------------------------------------------------------------|--------------------------------|-------------------------------|-------------------------------|-------------------------------|-------------------------------|-------------------------------|
| <b>Yes</b>                                                   | 0.024<br>(0.034)               | -0.598<br>(0.467)             | 0.096<br>(0.072)              | -0.035<br>(0.079)             | 0.071<br>(0.060)              | 0.001<br>(0.057)              |
| <b>Psycho-social support (reference category: no)</b>        |                                |                               |                               |                               |                               |                               |
| <b>Yes</b>                                                   | 0.085 <sup>c</sup><br>(0.046)  | -0.199<br>(0.179)             | 0.145 <sup>c</sup><br>(0.081) | 0.157<br>(0.103)              | 0.082<br>(0.097)              | 0.006<br>(0.101)              |
| <b>Tobacco use (reference category: no)</b>                  |                                |                               |                               |                               |                               |                               |
| <b>Yes</b>                                                   | 0.492 <sup>a</sup><br>(0.024)  | 0.761 <sup>a</sup><br>(0.084) | 0.634 <sup>a</sup><br>(0.046) | 0.539 <sup>a</sup><br>(0.054) | 0.303 <sup>a</sup><br>(0.052) | 0.327 <sup>a</sup><br>(0.052) |
| <b>Ability to afford treatment (reference category: no)</b>  |                                |                               |                               |                               |                               |                               |
| <b>Yes</b>                                                   | 0.023<br>(0.044)               | -0.108<br>(0.139)             | 0.119<br>(0.090)              | 0.003<br>(0.085)              | 0.132<br>(0.105)              | -0.085<br>(0.097)             |
| <b>Education (reference category: illiterate/unschooled)</b> |                                |                               |                               |                               |                               |                               |
| <b>Primary school graduates</b>                              | -0.149 <sup>a</sup><br>(0.039) | N/A                           | N/A                           | N/A                           | N/A                           | N/A                           |
| <b>Primary education graduates</b>                           | -0.243 <sup>a</sup><br>(0.047) | N/A                           | N/A                           | N/A                           | N/A                           | N/A                           |
| <b>High school graduates</b>                                 | -0.232 <sup>a</sup><br>(0.046) | N/A                           | N/A                           | N/A                           | N/A                           | N/A                           |
| <b>University graduates</b>                                  | -0.216 <sup>a</sup><br>(0.047) | N/A                           | N/A                           | N/A                           | N/A                           | N/A                           |

<sup>a</sup>p<.01; <sup>b</sup>p<.05; <sup>c</sup>p<.10

Model 1: Illiterate/ unschooled, Model 2: Primary school graduates, Model 3: Primary education graduates, Model 4: High school graduates; Model 5: University graduates

## DISCUSSION

Tobacco use causes significant health problems not only for those who use them, but also for those who do not, as tobacco smoke spreads into the environment. Each year, new evidence regarding the health risks associated with the exposure of others to tobacco smoke is obtained. Therefore, it is necessary to understand the factors that contribute to tobacco smoke in order to reduce the prevalence of secondhand smoke.

This study used data from 17,084 individuals who participated in the Turkish Statistical Institute's 2019 Turkey Health Survey. The factors affecting an individual's exposure to tobacco smoke in Turkey according to their educational level were determined in this study using binary logistic regression analysis.

The variables of education level, age, gender, marital status, general health, getting psychosocial assistance, and tobacco smoking status were found to be associated with exposure to tobacco smoke in Entire Model, which included the education variable. Furthermore, it was found in the study that the importance and effect of the variables in tobacco smoke exposure change depending on the people' educational level. As a result, risk variables for tobacco smoke exposure have been determined based on educational attainment.

1  
2  
3 In all of the models, it was determined that there was a relationship between people's age and  
4 their exposure to tobacco smoke. It has been determined that people aged 45-54 and 55 and  
5 above are less likely to be exposed to tobacco smoking than people aged 34 and below  
6 (reference group) in Model 1 (illiterate/unschooled) and Model 4 (high school graduates). All  
7 age categories were found to be statistically significant in Model 2 (primary school graduates),  
8 Model 3 (primary education graduates) and Model 5 (university graduates). It has been  
9 determined that the probability of exposure to tobacco smoke decreases as age increases.  
10  
11  
12  
13  
14  
15

16 There was a relationship between individuals' gender and exposure to tobacco smoke only in  
17 Model 3 (primary education graduates) and Model 5 (university graduates). Women were found  
18 to be less likely than men to be exposed to tobacco smoke in these models.  
19  
20  
21

22 There was a relationship between people's marital status and their exposure to tobacco smoke  
23 in all models. It has been determined that an unmarried individual is less likely to be exposed  
24 to tobacco smoke than a married individual in Model 1 (illiterate/unschooled). It has been  
25 determined that an unmarried individual is more likely to be exposed to tobacco smoke than a  
26 married individual in Model 4 (high school graduates) and Model 5 (university graduates). In  
27 Model 2 (primary school graduates), it was determined that a divorced/widowed person is less  
28 likely than a married person to be exposed to tobacco smoke.  
29  
30  
31  
32  
33  
34

35 Only in Model 2 (primary school graduates), Model 3 (primary education graduates), and  
36 Model 4 (high school graduates), it was determined that there was a relationship between the  
37 general health status of individuals and exposure to tobacco smoke. According to these models,  
38 an individual with a moderate general health status is more likely to be exposed to tobacco  
39 smoke than someone with a very good general health status.  
40  
41  
42  
43  
44

45 It was determined that there was a relationship between persons' employment status and SHS  
46 exposure only in Model 3 (primary education graduates). According to this model, a working  
47 individual is less likely to be exposed to tobacco smoke than a non-working individual.  
48  
49  
50

51 Only in Model 2 (primary school graduates), there was a relationship between receiving psycho-  
52 social support and exposure to tobacco smoke. According to this model, an individual who  
53 received psycho-social support was more likely to be exposed to tobacco smoke than an  
54 individual who did not receive psycho-social support.  
55  
56  
57  
58  
59  
60



1  
2  
3 It was determined in all models that there was a relationship between people's tobacco use status  
4 and their exposure to tobacco smoke. According to these models, an individual who smokes  
5 tobacco is more likely to be exposed to tobacco smoke than someone who does not smoke.  
6  
7

8  
9 The study discovered that as one's age increased, the likelihood of being exposed to tobacco  
10 decreased. Similar results were obtained in other studies [75, 76, 91, 92]. As people age, they  
11 realize that tobacco use is a risk factor for a variety of chronic diseases and develop a greater  
12 awareness of health issues such as quitting smoking [93]. Numerous studies have revealed that  
13 individuals with high levels/dangerous/risky use of tobacco appear to be older than their actual  
14 age [94]. Furthermore, the reason for the decline in tobacco use as individuals age may be their  
15 obsession with looking young, which makes them more cautious about tobacco product use [7].  
16 On the other hand, as people age, they take their health more seriously and have more time and  
17 energy to devote to anti-tobacco campaigns. In this context, as the prevalence of people who  
18 have given up tobacco products increases with age, the probability of being exposed to tobacco  
19 smoke decreases [93].  
20  
21  
22  
23  
24  
25  
26  
27  
28

29 Individuals who receive psycho-social support are more likely to be exposed to tobacco smoke  
30 than those who do not receive psycho-social support. Similar findings have been reported in  
31 other studies [95, 96]. Interventions aimed at reducing SHS exposure can help people's mental  
32 health. Individual-level therapies, such as education regarding the dangers of SHS exposure and  
33 avoidance techniques, may also be explored as supplementary strategies for depression  
34 management [7].  
35  
36  
37  
38  
39

40 In the study, individuals with a moderate general health status were found to be more exposed  
41 to tobacco smoke than those with a very good/good general health condition. According to  
42 studies, individuals who care about their health are more conscientious about avoiding exposure  
43 to tobacco smoke [95, 96].  
44  
45  
46  
47

48 Individuals who are employed were found to be less exposed to tobacco smoke than those who  
49 are unemployed. According to a study that reached a similar conclusion, the risk of exposure to  
50 tobacco increases as unemployed individuals stay at home longer [97]. However, there are  
51 studies that conclude that employed individuals are more exposed to tobacco smoke than  
52 unemployed individuals [76, 91].  
53  
54  
55  
56  
57

58 Individuals who have been exposed to tobacco use for an extended period of time develop  
59 similar health problems to those who use tobacco products. According to the study, those who  
60

1  
2  
3 use tobacco products are more exposed to tobacco smoke than those who do not. Several studies  
4 in the literature reported similar findings [74, 89].  
5  
6

7 Individuals who are illiterate and have never married were determined to be less likely to be  
8 exposed to tobacco smoke than married individuals. Similar findings have been reported in the  
9 literature [75]. On the other hand, the study discovered that individuals who graduated from  
10 primary school with their marital status as divorced/spouse died were less exposed to tobacco  
11 smoke than married individuals. Similar results were obtained in some studies [98, 99]. Studies  
12 have suggested that this may be due to the fact that the majority of these individuals live alone  
13 and are thus less exposed to smoking at home [93].  
14  
15  
16  
17  
18  
19

20 According to the study, men are more exposed to tobacco smoke than women are. Similar  
21 results were obtained in other studies [76]. On the other hand, some studies in the literature  
22 argue that women are more exposed to tobacco smoke than men. Studies have reported that this  
23 may be highly correlated with women's socioeconomic status [75]. Additionally, some studies  
24 have discovered that women are more likely to be exposed to SHS because they spend more  
25 time doing housework in regulated industries that are less likely to challenge SHS policies  
26 [100].  
27  
28  
29  
30  
31  
32

33 This study is not without limitations. To begin, the study relies on secondary data. The variables  
34 required for statistical analysis are those found in the data set. Additionally, some variables  
35 such as individuals' occupations, home ownership status, levels of exposure to tobacco smoke  
36 by parents, siblings, as well as other household members and friends were not included in the  
37 analysis. Furthermore, because the data set did not include information about the location of  
38 tobacco smoke exposure, this study focused on general SHS exposure. The distinction between  
39 SHS-exposed locations such as homes, public places, workplaces, restaurants, and bars was  
40 omitted. Secondly, because tests to determine individuals' exposure to tobacco smoke could  
41 not be conducted in a laboratory setting, the study relied on the women's own responses. The  
42 data obtained might be biased as a result of this data collection method.  
43  
44  
45  
46  
47  
48  
49  
50

51 This limitation may be overcome in the future by more objective measures of SHS exposure.  
52 Future research should further explore determinants that cannot be identified qualitatively.  
53 Objective measurement of smoke inhalation can be helpful in avoiding reporting bias. In  
54 addition, studies must account for variation within countries and acknowledge that there may  
55  
56  
57  
58  
59  
60

1  
2  
3 be significant differences in prevalence and determinants between regions within the same  
4 country.  
5

6  
7 Future research can identify key factors influencing an individual's social acceptability of SHS  
8 exposure. Identifying these factors is critical when planning and designing tobacco prevention  
9 programs that target SHS exposure. If health risks are communicated effectively and guided by  
10 the demands of (several) target groups, the social acceptability of tobacco exposure will be  
11 further reduced.  
12  
13  
14  
15

## 16 17 **CONCLUSION** 18

19  
20 As a result of the study, it is emphasized that men, young individuals, individuals with moderate  
21 and very good general health status, those who use tobacco, those who are unemployed and  
22 those who receive psycho-social support should be targeted. These groups require additional  
23 protection against SHS exposure. Appropriate strategies for reducing SHS exposure should be  
24 developed, taking into account public health strategies for increasing awareness of the adverse  
25 health effects of SHS exposure and the determinants of tobacco exposure. Turkey's National  
26 Tobacco Control Program Action Plan, coordinated by the Ministry of Health, took effect on  
27 January 27, 2015. The strategies outlined in said action plan include ensuring that society  
28 exhibits the right attitudes and behaviors in response to violations by increasing awareness that  
29 protection from second hand smoke exposure is a human right in terms of health, enacting  
30 necessary legislative changes to expand the areas where tobacco and tobacco products are  
31 prohibited, and increasing public awareness and advocacy on the issue. In addition, the National  
32 Tobacco Control Program Action Plan includes strategies for establishing the necessary system  
33 for determining and regularly monitoring the level of second hand smoke exposure in society,  
34 as well as for initiating and maintaining social support for passive smoke prevention in  
35 homes/living areas/private properties.  
36  
37  
38  
39  
40  
41  
42  
43  
44  
45  
46  
47

48 Policies prohibiting tobacco use in public places are necessary for a variety of reasons.  
49 Primarily, the public is uncomfortable with SHS exposure and views it as harmful to health.  
50 However, the majority of non-smokers take no personal precautions to avoid exposure to SHS.  
51 Government agencies must take action to protect non-smokers. Moreover, restricting tobacco  
52 use in public places may increase the likelihood that people will use fewer tobacco products or  
53 will quit entirely.  
54  
55  
56  
57  
58  
59  
60

## References

1. Alkan, Ö. and A. Demir, *Investigation and detection of risk factors related to the period without tobacco consumption*. *Addicta: The Turkish Journal on Addictions*, 2019. **6**(4): p. 99-115.
2. WHO, *WHO global report: mortality attributable to tobacco*, 2012: Switzerland: Geneva
3. Yousuf, H., et al., *Estimated worldwide mortality attributed to secondhand tobacco smoke exposure, 1990-2016*. *JAMA Network Open*, 2020. **3**(3): p. e201177-e201177.
4. WHO, *Enforcing bans on tobacco advertising, promotion and sponsorship: WHO Report on the global tobacco epidemic*, 2013: Switzerland: Geneva.
5. Rodgman, A. and T.A. Perfetti, *The chemical components of tobacco and tobacco smoke*. Second ed. 2013, New York: CRC Press.
6. Apelberg, B.J., et al., *Environmental monitoring of secondhand smoke exposure*. *Tobacco Control*, 2013. **22**(3): p. 147-155.
7. Alkan, Ö. and Ş. Ünver, *Tobacco smoke exposure among women in Turkey and determinants*. *Journal of Substance Use*, 2021: p. 1-7.
8. Dinas, P.C., et al., *Acute effects of second-hand smoke on complete blood count*. *International Journal of Environmental Health Research*, 2014. **24**(1): p. 56-62.
9. Öberg, M., et al., *Worldwide burden of disease from exposure to second-hand smoke: a retrospective analysis of data from 192 countries*. *The lancet*, 2011. **377**(9760): p. 139-146.
10. Barnoya, J. and S.A. Glantz, *Cardiovascular effects of secondhand smoke: nearly as large as smoking*. *Circulation*, 2005. **111**(20): p. 2684-2698.
11. Simons, E., et al., *Maternal second-hand smoke exposure in pregnancy is associated with childhood asthma development*. *The Journal of Allergy and Clinical Immunology: In Practice*, 2014. **2**(2): p. 201-207.

12. Faber, T., et al., *Effect of tobacco control policies on perinatal and child health: a systematic review and meta-analysis*. *The Lancet Public Health*, 2017. **2**(9): p. e420-e437.
13. Sun, L.-Y., et al., *Affecting factors of secondhand smoke exposure in Korea: Focused on different exposure locations*. *Journal of Korean medical science*, 2016. **31**(9): p. 1362-1372.
14. Hoffman, S.J. and C. Tan, *Overview of systematic reviews on the health-related effects of government tobacco control policies*. *BMC Public Health*, 2015. **15**:1: p. 1-11.
15. Hyland, A., J. Barnoya, and J.E. Corral, *Smoke-free air policies: past, present and future*. *Tobacco Control*, 2012. **21**(2): p. 154-161.
16. Jones, M.R., et al., *Cardiovascular events following smoke-free legislations: an updated systematic review and meta-analysis*. *Current Environmental Health Reports*, 2014. **1**: p. 239-249.
17. WHO, *WHO Framework Convention on Tobacco Control*, 2003: Switzerland: Geneva
18. Zasimova, L., *Analysis of non-compliance with smoke-free legislation in Russia*. *International Journal of Public Health*, 2019. **64**(3): p. 413-422.
19. Perkins, R. and E. Neumayer, *Adoption and compliance in second-hand smoking bans: a global econometric analysis*. *International Journal of Public Health*, 2014. **59**(5): p. 859-866.
20. Feldman, E.A. and R. Bayer, *The triumph and tragedy of tobacco control: a tale of nine nations*. *Annual Review of Law and Social Science*, 2011. **7**: p. 79-100.
21. Vathesatogkit, P. and N. Charoenca, *Tobacco control: lessons learnt in Thailand*. *Indian Journal of Public Health*, 2011. **55**(3): p. 228-233.
22. Ali, I., *Adoption of the Tobacco Control Regulations-Legislative Instrument (LI) 2247 to reduce the burden of NCDs and to advance WHO FCTC implementation in Ghana*. *Tobacco Induced Diseases*, 2018. **16**(1): p. A428.

- 1  
2  
3 23. Singh, A., et al., *Exposure to secondhand smoke in hospitality settings in Ghana: Evidence of changes since implementation of smoke-free legislation*. Tobacco Induced Diseases, 2020. **18:44**: p. 1-10.  
4  
5  
6  
7  
8
- 9 24. Peruga, A., et al., *Night entertainment venues comply poorly with the smoke-free law in Chile*. Gaceta Sanitaria, 2021. **35(4)**: p. 402-404.  
10  
11  
12
- 13 25. Hone, T., et al., *Smoke-free legislation and neonatal and infant mortality in Brazil: longitudinal quasi-experimental study*. Tobacco Control, 2020. **29(3)**: p. 312-319.  
14  
15  
16  
17
- 18 26. Carrion-Valero, F., et al., *Impact of the 2005 and 2010 Spanish smoking laws on hospital admissions for tobacco-related diseases in Valencia, Spain*. Public Health, 2020. **180**: p. 29-37.  
19  
20  
21  
22  
23
- 24 27. Mallma, P., C. Carcamo, and J.S. Kaufman, *The impact of anti-tobacco legislation on birth weight in Peru*. Global Health Research and Policy, 2020. **5:11**: p. 1-10.  
25  
26  
27  
28
- 29 28. Grace, C., *15.7 Legislation to ban smoking in public spaces*, in *Tobacco in Australia: Facts and issues*, M.H. Winstanley and M. Scollo, Editors. 2019, Cancer Council Victoria.  
30  
31  
32  
33
- 34 29. Dubray, J., et al., *Formative Evaluation of the Smoke-Free Ontario Act: Comparison of Baseline and Post-SFOA Measurements*. Special Report Series 2007, Toronto, ON: Ontario Tobacco Research Unit.  
35  
36  
37  
38  
39  
40
- 41 30. Repace, J., et al., *Air quality, mortality, and economic benefits of a smoke-free workplace law for non-smoking Ontario bar workers*. Indoor Air, 2013. **23**: p. 93-104.  
42  
43  
44
- 45 31. Galán, I., et al., *Impact of the "Tobacco control law" on exposure to environmental tobacco smoke in Spain*. BMC Public Health, 2007. **7:1**: p. 1-7.  
46  
47  
48  
49
- 50 32. Thrasher, J.F., et al., *Differential impact of local and federal smoke-free legislation in Mexico: a longitudinal study among adult smokers*. Salud Publica de Mexico, 2010. **52(2)**: p. S244-S253.  
51  
52  
53  
54  
55
- 56 33. Raute, L.J., P.C. Gupta, and M.S. Pednekar, *Smoking ban and indoor air quality in restaurants in Mumbai, India*. Indian Journal of Occupational and Environmental Medicine, 2011. **15(2)**: p. 68-72.  
57  
58  
59  
60

- 1  
2  
3 34. Braverman, M.T., L.E. Aarø, and J. Hetland, *Changes in smoking among restaurant and*  
4 *bar employees following Norway's comprehensive smoking ban.* Health Promotion  
5 International, 2008. **23**(1): p. 5-15.  
6  
7  
8  
9 35. Lemstra, M., C. Neudorf, and J. Opondo, *Implications of a public smoking ban.*  
10 Canadian Journal of Public Health, 2008. **99**(1): p. 62-65.  
11  
12  
13 36. Gallus, S., et al., *Smoking in Italy 2005–2006: effects of a comprehensive National*  
14 *Tobacco Regulation.* Preventive Medicine, 2007. **45**(2-3): p. 198-201.  
15  
16  
17  
18 37. Guerrero, F., F.-J. Santonja, and R.-J. Villanueva, *Analysing the Spanish smoke-free*  
19 *legislation of 2006: a new method to quantify its impact using a dynamic model.*  
20 International Journal of Drug Policy, 2011. **22**(4): p. 247-251.  
21  
22  
23  
24 38. Mullally, B.J., et al., *The effect of the Irish smoke-free workplace legislation on smoking*  
25 *among bar workers.* European Journal of Public Health, 2009. **19**(2): p. 206-211.  
26  
27  
28  
29 39. Kaplan, B., et al., *Evaluation of Secondhand smoke using PM2. 5 and observations in a*  
30 *random stratified sample in hospitality venues from 12 cities.* International Journal of  
31 Environmental Research and Public Health, 2019. **16**(1381): p. 1-9.  
32  
33  
34  
35 40. Kaplan, B., et al., *Smoke-free Turkey: evaluation of outdoor areas of public places.*  
36 Environmental Research, 2019. **175**: p. 79-83.  
37  
38  
39  
40 41. MH, *Küresel yetişkin tütün araştırması Türkiye 2012.* 2014, Ankara: Sağlık Bakanlığı  
41 (Ministry of Health) Yayın No: 948.  
42  
43  
44 42. Lin, P.-L., et al., *Second-hand smoke exposure and the factors associated with*  
45 *avoidance behavior among the mothers of pre-school children: a school-based cross-*  
46 *sectional study.* BMC Public Health, 2010. **10**(1): p. 1-9.  
47  
48  
49  
50 43. Shwarz, M., B. Collins, and U. Nair, *Factors associated with maternal depressive*  
51 *symptoms among low-income, African American smokers enrolled in a secondhand*  
52 *smoke reduction programme.* Mental Health in Family Medicine, 2012. **9**(4): p. 275-  
53 287.  
54  
55  
56  
57  
58 44. Galea, S., et al., *Education inequality and use of cigarettes, alcohol, and marijuana.*  
59 Drug and Alcohol Dependence, 2007. **90**: p. S4-S15.  
60

- 1  
2  
3 45. Adler, N.E. and K. Newman, *Socioeconomic disparities in health: pathways and*  
4 *policies*. Health Affairs, 2002. **21**(2): p. 60-76.
- 5  
6  
7  
8 46. Kitagawa Evelyn, M. and M. Hauser Philip, *Differential mortality in the United States:*  
9 *A study in socioeconomic epidemiology*. 1973, Cambridge, Mass.: Harvard University  
10 Press.
- 11  
12  
13  
14 47. Christenson, B.A. and N.E. Johnson, *Educational inequality in adult mortality: an*  
15 *assessment with death certificate data from Michigan*. Demography, 1995. **32**(2): p.  
16 215-229.
- 17  
18  
19  
20 48. Hemingway, H., et al., *Impact of socioeconomic status on coronary mortality in people*  
21 *with symptoms, electrocardiographic abnormalities, both or neither: the original*  
22 *Whitehall study 25 year follow up*. Journal of Epidemiology & Community Health,  
23 2000. **54**(7): p. 510-516.
- 24  
25  
26  
27  
28 49. Assari, S. and M. Bazargan, *Unequal effects of educational attainment on workplace*  
29 *exposure to second-hand smoke by race and ethnicity; minorities' diminished returns*  
30 *in the National Health Interview Survey (NHIS)*. Journal of Medical Research and  
31 Innovation, 2019. **3**(2): p. e000179.
- 32  
33  
34  
35  
36 50. Assari, S., M. Farokhnia, and R. Mistry, *Education attainment and alcohol binge*  
37 *drinking: diminished returns of Hispanics in Los Angeles*. Behavioral Sciences, 2019.  
38 **9**(9): p. 1-11.
- 39  
40  
41  
42 51. Yu, Y., *Educational differences in obesity in the United States: a closer look at the*  
43 *trends*. Obesity, 2012. **20**(4): p. 904-908.
- 44  
45  
46  
47 52. Gadeyne, S., et al., *Does birth history account for educational differences in breast*  
48 *cancer mortality? a comparison of premenopausal and postmenopausal women in*  
49 *Belgium*. International Journal of Cancer, 2012. **131**(12): p. 2878-2885.
- 50  
51  
52  
53 53. Marcu, A., et al., *Educational differences in likelihood of attributing breast symptoms*  
54 *to cancer: a vignette-based study*. Psycho-Oncology, 2016. **25**(10): p. 1191-1197.
- 55  
56  
57  
58 54. Rattadilok, P., *Sino-UK educational differences: the impacts of cultures and the current*  
59 *educational curricular on students in computer science*, in *Transnational Higher*  
60



- 1  
2  
3 *Education in Computing Courses*, J. Carter and C. Rosen, Editors. 2019, Springer. p.  
4 39-59.  
5  
6  
7  
8 55. Antunes, P., L. Xiao, and J.A. Pino, *Assessing the impact of educational differences in*  
9 *HCI design practice*. International Journal of Technology and Design Education, 2014.  
10 **24**(3): p. 317-335.  
11  
12  
13  
14 56. Huang, G., F. Guo, and G. Chen, *Educational differences of healthy life expectancy*  
15 *among the older adults in China: a multidimensional examination using the multistate*  
16 *life table method*. Educational Gerontology, 2019. **45**(10): p. 624-635.  
17  
18  
19  
20 57. Casanova, O. and R.M. Serrano, *La Educación Musical en el actual currículo español. ¿*  
21 *Qué formación recibe el alumnado en la enseñanza Primaria?* Revista Electrónica  
22 Complutense de Investigación en Educación Musical, 2018. **15**: p. 3-17.  
23  
24  
25  
26 58. Miettinen, L., et al., *Initiating mobilizing networks: Mapping intercultural competences*  
27 *in two music teacher programmes in Israel and Finland*. Research Studies in Music  
28 Education, 2018. **40**(1): p. 67-88.  
29  
30  
31  
32 59. Ünver, Ş. and Ö. Alkan, *Determinants of e-commerce use at different educational*  
33 *levels: empirical evidence from Turkey*. International Journal of Advanced Computer  
34 Science and Applications, 2021. **12**(3): p. 40-49.  
35  
36  
37  
38 60. Huang, Y. and H. Gong, *Educational expectations of left-behind children in China:*  
39 *determinants and gender differences*. Applied Research in Quality of Life, 2021: p. 1-  
40 23.  
41  
42  
43  
44 61. Brdese, H. and W. Alsaggaf, *Is There a Real Need for the Preparatory Years in Higher*  
45 *Education? An Educational Data Analysis for College and Future Career Readiness*.  
46 Social Sciences, 2021. **10**(396): p. 1-16.  
47  
48  
49  
50 62. Jeong, B.Y., et al., *Tolerance for and potential indicators of second-hand smoke*  
51 *exposure among nonsmokers: a comparison of self-reported and cotinine verified*  
52 *second-hand smoke exposure based on nationally representative data*. Preventive  
53 Medicine, 2014. **67**: p. 280-287.  
54  
55  
56  
57  
58  
59  
60

- 1  
2  
3 63. Arechavala, T., et al., *Validity of self-reported indicators to assess secondhand smoke*  
4 *exposure in the home*. Environmental Research, 2018. **164**: p. 340-345.  
5  
6  
7 64. Precioso, J., et al., *Exposição de crianças ao fumo ambiental do tabaco: avaliação de*  
8 *programa preventivo*. Psicologia, Saúde e Doenças, 2017. **18**(2): p. 591-601.  
9  
10  
11 65. Arechavala, T., et al., *Second-hand smoke exposure in homes with children: assessment*  
12 *of airborne nicotine in the living room and children's bedroom*. Tobacco Control, 2018.  
13 **27**(4): p. 399-406.  
14  
15  
16  
17 66. Parro, J., et al., *Secondhand tobacco smoke exposure and pulmonary function: a cross-*  
18 *sectional study among non-smoking employees of bar and restaurants in Santiago,*  
19 *Chile*. BMJ Open, 2017. **7**(10): p. e017811.  
20  
21  
22  
23 67. Siddiqi, K., et al., *Children learning about secondhand smoke (CLASS II): protocol of*  
24 *a pilot cluster randomised controlled trial*. BMJ Open, 2015. **5**: p. e008749.  
25  
26  
27  
28 68. Xu, Y., et al., *Association between secondhand smoke exposure at home and cigarette*  
29 *gifting and sharing in Zhejiang, China: a repeat cross-sectional study*. BMJ Open,  
30 2016. **6**: p. e010058.  
31  
32  
33  
34 69. Lin, P.-L., et al., *Second-hand smoke exposure and the factors associated with*  
35 *avoidance behavior among the mothers of pre-school children: a school-based cross-*  
36 *sectional study*. BMC Public Health, 2010. **10**:606: p. 1-9.  
37  
38  
39  
40 70. Mbulo, L., et al., *Tobacco use and secondhand smoke exposure among older adults in*  
41 *India*. Journal of Aging and Health, 2021: p. 1-12.  
42  
43  
44  
45 71. Frazer, K., et al., *Smoking prevalence and secondhand smoke exposure during*  
46 *pregnancy and postpartum—establishing risks to health and human rights before*  
47 *developing a tailored programme for smoking cessation*. International Journal of  
48 Environmental Research and Public Health, 2020. **17**(1-11).  
49  
50  
51  
52 72. King, B.A., et al., *Exposure to secondhand smoke and attitudes toward smoke-free*  
53 *workplaces among employed US adults: findings from the National Adult Tobacco*  
54 *Survey*. Nicotine & Tobacco Research, 2014. **16**(10): p. 1307-1318.  
55  
56  
57  
58  
59  
60

- 1  
2  
3 73. Lee, B.-E. and E.-H. Ha, *Exposure to environmental tobacco smoke among South*  
4 *Korean adults: a cross-sectional study of the 2005 Korea National Health and Nutrition*  
5 *Examination Survey*. Environmental Health, 2011. **10:29**: p. 1-10.  
6  
7  
8  
9 74. Fischer, F., et al., *Prevalence and determinants of secondhand smoke exposure among*  
10 *women in Bangladesh, 2011*. Nicotine & Tobacco Research, 2015. **17(1)**: p. 58-65.  
11  
12  
13 75. Bonevski, B., et al., *Smoky homes: gender, socioeconomic and housing disparities in*  
14 *second hand tobacco smoke (SHS) exposure in a large population-based Australian*  
15 *cohort*. Preventive Medicine, 2014. **60**: p. 95-101.  
16  
17  
18  
19 76. Fischer, F. and A. Kraemer, *Factors associated with secondhand smoke exposure in*  
20 *different settings: Results from the German Health Update (GEDA) 2012*. BMC Public  
21 *Health*, 2016. **16(1)**: p. 1-9.  
22  
23  
24  
25 77. López, M.J., et al., *Social inequalities in secondhand smoke exposure in children in*  
26 *Spain*. Tobacco Induced Diseases, 2018. **16:14**: p. 1-6.  
27  
28  
29  
30 78. Akinboro, O., et al., *Secondhand smoke exposure among community-dwelling adult*  
31 *cancer survivors in the United States: 1999–2012*. Cancer Epidemiology and Prevention  
32 *Biomarkers*, 2017. **26(8)**: p. 1296-1305.  
33  
34  
35  
36 79. Nan, X., et al., *Prevalence, knowledge and education level associated with secondhand*  
37 *smoke exposure among never-smoking women in Inner Mongolia, Northern China*.  
38 *Tobacco Induced Diseases*, 2020. **18:35**: p. 1-11.  
39  
40  
41  
42 80. Vitória, P.D., C. Nunes, and J. Precioso, *Parents' educational level and second-hand*  
43 *tobacco smoke exposure at home in a sample of Portuguese children*. Revista  
44 *Portuguesa de Pneumologia* 2017. **23(4)**: p. 221-224.  
45  
46  
47  
48 81. Gharaibeh, H., et al., *Knowledge, attitudes, and behavior in avoiding secondhand smoke*  
49 *exposure among non-smoking employed women with higher education in Jordan*.  
50 *International Journal of Environmental Research and Public Health*, 2011. **8(11)**: p.  
51 4207-4219.  
52  
53  
54  
55 82. TurkStat, *Türkiye Sağlık Araştırması (Turkey Health Survey) Yayın No: 4590, 2020:*  
56 *Ankara*.  
57  
58  
59  
60

- 1  
2  
3 83. Cavelaars, A.E.J., et al., *Educational differences in smoking: international comparison*.  
4 BMJ: British Medical Journal, 2000. **320**(7242): p. 1102-1107.  
5  
6  
7  
8 84. Assari, S. and R. Mistry, *Educational attainment and smoking status in a national*  
9 *sample of American adults; evidence for the blacks' diminished return*. International  
10 Journal of Environmental Research and Public Health, 2018. **15**(763): p. 1-12.  
11  
12  
13  
14 85. Karaaslan, K.Ç., *Determinants of online shopping attitudes of households in Turkey*.  
15 Journal of Modelling in Management, 2021.  
16  
17  
18 86. Karaaslan, K.Ç., *Analysis of factors affecting individuals' sources of happiness with*  
19 *multinomial logistic model*. Journal of Measurement and Evaluation in Education and  
20 Psychology, 2021. **12**(3): p. 286-302.  
21  
22  
23  
24 87. Crimmins, E.M. and Y. Saito, *Trends in healthy life expectancy in the United States,*  
25 *1970–1990: gender, racial, and educational differences*. Social Science & Medicine,  
26 2001. **52**(11): p. 1629-1641.  
27  
28  
29  
30 88. Alkan, Ö., H. Abar, and Ö. Gençer, *Analysis of factors affecting alcohol and tobacco*  
31 *concurrent use by bivariate probit model in Turkey*. Environmental Science and  
32 Pollution Research, 2021: p. 1-8.  
33  
34  
35  
36 89. Alkan, Ö. and H. Abar, *Determination of factors influencing tobacco consumption in*  
37 *Turkey using categorical data analyses I*. Archives of Environmental & Occupational  
38 Health, 2020. **75**(1): p. 27-35.  
39  
40  
41  
42 90. Alkan, Ö. and H.H. Tekmanlı, *Determination of the factors affecting sexual violence*  
43 *against women in Turkey: a population-based analysis*. BMC Women's Health, 2021.  
44 **21**(1): p. 1-15.  
45  
46  
47  
48 91. Stafylis, C., et al., *Prevalence and determinants of smoking and secondhand smoke*  
49 *exposure in a rural population of central Greece: a cross-sectional study*. Rural and  
50 Remote Health, 2018. **18**(2).  
51  
52  
53  
54 92. Lee, B.-E. and E.-H. Ha, *Exposure to environmental tobacco smoke among South*  
55 *Korean adults: a cross-sectional study of the 2005 Korea National Health and Nutrition*  
56 *Examination Survey*. Environmental Health, 2011. **10**(1): p. 1-10.  
57  
58  
59  
60

- 1  
2  
3 93. Li, Z., et al., *Prevalence and associated factors of passive smoking among women in*  
4 *Jilin Province, China: a cross-sectional study*. International Journal of Environmental  
5 Research and Public Health, 2015. **12**(11): p. 13970-13980.  
6  
7  
8  
9 94. Schou, A.L., et al., *Alcohol consumption, smoking and development of visible age-*  
10 *related signs: a prospective cohort study*. Journal of Epidemiology Community Health,  
11 2017. **71**(12): p. 1177-1184.  
12  
13  
14  
15 95. Patten, S.B., et al., *Major depression and secondhand smoke exposure*. Journal of  
16 Affective Disorders, 2018. **225**: p. 260-264.  
17  
18  
19  
20 96. Zeng, Y.-N. and Y.-M. Li, *Secondhand smoke exposure and mental health in adults: A*  
21 *meta-analysis of cross-sectional studies*. Social Psychiatry and Psychiatric  
22 Epidemiology, 2016. **51**(9): p. 1339-1348.  
23  
24  
25  
26 97. Alghamdi, A.S., et al., *Socioeconomic determinants of exposure to secondhand smoke*  
27 *among pregnant women*. International Journal of Women's Health and Reproduction  
28 Sciences, 2016. **4**(2): p. 59-63.  
29  
30  
31  
32 98. Li, Q., J. Hsia, and G. Yang, *Prevalence of smoking in China in 2010*. New England  
33 Journal of Medicine, 2011. **364**(25): p. 2469-2470.  
34  
35  
36  
37 99. Tanaka, K., et al., *Active and passive smoking and prevalence of periodontal disease in*  
38 *young Japanese women*. Journal of Periodontal Research, 2013. **48**(5): p. 600-605.  
39  
40  
41 100. Greaves, L.J. and N.J. Hemsing, *Sex, gender, and secondhand smoke policies:*  
42 *implications for disadvantaged women*. American Journal of Preventive Medicine,  
43 2009. **37**(2): p. S131-S137.  
44  
45  
46  
47  
48  
49  
50  
51  
52  
53  
54  
55  
56  
57  
58  
59  
60

**Appendix 1.** VIF values for all models

| Variables                                                         | Entire Model | Model 1 | Model 2 | Model 3 | Model 4 | Model 5 |
|-------------------------------------------------------------------|--------------|---------|---------|---------|---------|---------|
|                                                                   | VIF          | VIF     | VIF     | VIF     | VIF     | VIF     |
| <b>Age (reference category: 34 and under)</b>                     |              |         |         |         |         |         |
| 35-44                                                             | 1.70         | 1.69    | 3.04    | 1.34    | 1.6     | 1.3     |
| 45-54                                                             | 1.82         | 2.09    | 3.45    | 1.33    | 1.44    | 1.25    |
| 55 +                                                              | 2.68         | 3.16    | 4.3     | 1.51    | 1.73    | 1.56    |
| <b>Gender (reference category: male)</b>                          |              |         |         |         |         |         |
| Female                                                            | 1.38         | 1.24    | 1.42    | 1.44    | 1.35    | 1.16    |
| <b>Marital status (reference category: married)</b>               |              |         |         |         |         |         |
| Never married                                                     | 1.62         | 1.16    | 1.14    | 1.65    | 1.7     | 1.29    |
| Divorced/Spouse died                                              | 1.17         | 1.19    | 1.09    | 1.09    | 1.1     | 1.09    |
| <b>General health status (reference category: very good/good)</b> |              |         |         |         |         |         |
| Moderate                                                          | 1.26         | 1.71    | 1.23    | 1.14    | 1.12    | 1.07    |
| Poor/Very bad                                                     | 1.35         | 1.82    | 1.25    | 1.11    | 1.1     | 1.05    |
| <b>Employment status (reference category: no)</b>                 |              |         |         |         |         |         |
| Yes                                                               | 1.44         | 1.16    | 1.35    | 1.46    | 1.41    | 1.31    |
| <b>Alcohol use (reference category: no)</b>                       |              |         |         |         |         |         |
| Yes                                                               | 1.17         | 1.05    | 1.13    | 1.17    | 1.12    | 1.08    |
| <b>Psycho-social support (reference category: no)</b>             |              |         |         |         |         |         |
| Yes                                                               | 1.03         | 1.01    | 1.04    | 1.04    | 1.05    | 1.03    |
| <b>Tobacco use (reference category: no)</b>                       |              |         |         |         |         |         |
| Yes                                                               | 1.19         | 1.18    | 1.2     | 1.29    | 1.16    | 1.08    |
| <b>Ability to afford treatment (reference category: no)</b>       |              |         |         |         |         |         |
| Yes                                                               | 1.04         | 1.05    | 1.05    | 1.04    | 1.04    | 1.08    |
| <b>Education (reference category: illiterate/unschooled)</b>      |              |         |         |         |         |         |
| Primary school graduates                                          | 2.67         | N/A     | N/A     | N/A     | N/A     | N/A     |
| Primary education graduates                                       | 2.54         | N/A     | N/A     | N/A     | N/A     | N/A     |
| High school graduates                                             | 2.57         | N/A     | N/A     | N/A     | N/A     | N/A     |
| University graduates                                              | 2.61         | N/A     | N/A     | N/A     | N/A     | N/A     |

Model 1: Illiterate/ unschooled, Model 2: Primary school graduates, Model 3: Primary education graduates, Model 4: High school graduates; Model 5: University graduates

**STROBE 2007 (v4) Statement—Checklist of items that should be included in reports of *cross-sectional studies***

| Section/Topic                | Item # | Recommendation                                                                                                                                                                       | Reported on page # |
|------------------------------|--------|--------------------------------------------------------------------------------------------------------------------------------------------------------------------------------------|--------------------|
| <b>Title and abstract</b>    | 1      | (a) Indicate the study’s design with a commonly used term in the title or the abstract                                                                                               | 1                  |
|                              |        | (b) Provide in the abstract an informative and balanced summary of what was done and what was found                                                                                  | 2                  |
| <b>Introduction</b>          |        |                                                                                                                                                                                      |                    |
| Background/rationale         | 2      | Explain the scientific background and rationale for the investigation being reported                                                                                                 | 5                  |
| Objectives                   | 3      | State specific objectives, including any prespecified hypotheses                                                                                                                     | 6                  |
| <b>Methods</b>               |        |                                                                                                                                                                                      |                    |
| Study design                 | 4      | Present key elements of study design early in the paper                                                                                                                              | 6-8                |
| Setting                      | 5      | Describe the setting, locations, and relevant dates, including periods of recruitment, exposure, follow-up, and data collection                                                      | 6-8                |
| Participants                 | 6      | (a) Give the eligibility criteria, and the sources and methods of selection of participants                                                                                          | 6-8                |
| Variables                    | 7      | Clearly define all outcomes, exposures, predictors, potential confounders, and effect modifiers. Give diagnostic criteria, if applicable                                             | 6-8                |
| Data sources/<br>measurement | 8*     | For each variable of interest, give sources of data and details of methods of assessment (measurement). Describe comparability of assessment methods if there is more than one group | 6-8                |
| Bias                         | 9      | Describe any efforts to address potential sources of bias                                                                                                                            | 6-8                |
| Study size                   | 10     | Explain how the study size was arrived at                                                                                                                                            | 6-8                |
| Quantitative variables       | 11     | Explain how quantitative variables were handled in the analyses. If applicable, describe which groupings were chosen and why                                                         | 6-8                |
| Statistical methods          | 12     | (a) Describe all statistical methods, including those used to control for confounding                                                                                                | 6-8                |
|                              |        | (b) Describe any methods used to examine subgroups and interactions                                                                                                                  | 6-8                |
|                              |        | (c) Explain how missing data were addressed                                                                                                                                          | 6-8                |
|                              |        | (d) If applicable, describe analytical methods taking account of sampling strategy                                                                                                   | 6-8                |
|                              |        | (e) Describe any sensitivity analyses                                                                                                                                                | 6-8                |
| <b>Results</b>               |        |                                                                                                                                                                                      |                    |

1  
2  
3  
4  
5  
6  
7  
8  
9  
10  
11  
12  
13  
14  
15  
16  
17  
18  
19  
20  
21  
22  
23  
24  
25  
26  
27  
28  
29  
30  
31  
32  
33  
34  
35  
36  
37  
38  
39  
40  
41  
42  
43  
44  
45  
46

|                          |     |                                                                                                                                                                                                              |       |
|--------------------------|-----|--------------------------------------------------------------------------------------------------------------------------------------------------------------------------------------------------------------|-------|
| Participants             | 13* | (a) Report numbers of individuals at each stage of study—eg numbers potentially eligible, examined for eligibility, confirmed eligible, included in the study, completing follow-up, and analysed            | 8-14  |
|                          |     | (b) Give reasons for non-participation at each stage                                                                                                                                                         | 8-14  |
|                          |     | (c) Consider use of a flow diagram                                                                                                                                                                           | 8-14  |
| Descriptive data         | 14* | (a) Give characteristics of study participants (eg demographic, clinical, social) and information on exposures and potential confounders                                                                     | 8-14  |
|                          |     | (b) Indicate number of participants with missing data for each variable of interest                                                                                                                          | 8-14  |
| Outcome data             | 15* | Report numbers of outcome events or summary measures                                                                                                                                                         | 8-14  |
| Main results             | 16  | (a) Give unadjusted estimates and, if applicable, confounder-adjusted estimates and their precision (eg, 95% confidence interval). Make clear which confounders were adjusted for and why they were included | 8-14  |
|                          |     | (b) Report category boundaries when continuous variables were categorized                                                                                                                                    | 8-14  |
|                          |     | (c) If relevant, consider translating estimates of relative risk into absolute risk for a meaningful time period                                                                                             | 8-14  |
| Other analyses           | 17  | Report other analyses done—eg analyses of subgroups and interactions, and sensitivity analyses                                                                                                               | 8-14  |
| <b>Discussion</b>        |     |                                                                                                                                                                                                              |       |
| Key results              | 18  | Summarise key results with reference to study objectives                                                                                                                                                     | 14-16 |
| Limitations              | 19  | Discuss limitations of the study, taking into account sources of potential bias or imprecision. Discuss both direction and magnitude of any potential bias                                                   | 14-16 |
| Interpretation           | 20  | Give a cautious overall interpretation of results considering objectives, limitations, multiplicity of analyses, results from similar studies, and other relevant evidence                                   | 14-16 |
| Generalisability         | 21  | Discuss the generalisability (external validity) of the study results                                                                                                                                        | 14-16 |
| <b>Other information</b> |     |                                                                                                                                                                                                              |       |
| Funding                  | 22  | Give the source of funding and the role of the funders for the present study and, if applicable, for the original study on which the present article is based                                                | 4     |

\*Give information separately for cases and controls in case-control studies and, if applicable, for exposed and unexposed groups in cohort and cross-sectional studies.

**Note:** An Explanation and Elaboration article discusses each checklist item and gives methodological background and published examples of transparent reporting. The STROBE checklist is best used in conjunction with this article (freely available on the Web sites of PLoS Medicine at <http://www.plosmedicine.org/>, Annals of Internal Medicine at <http://www.annals.org/>, and Epidemiology at <http://www.epidem.com/>). Information on the STROBE Initiative is available at [www.strobe-statement.org](http://www.strobe-statement.org).
