# Supplementary material for: Secondhand smoke exposure for different education levels: findings from a large, nationally representative survey in Turkey
Source: PubMed Central journal article supplement — BMJ Open. 2022 Feb 17;12(2):e057360. doi: 10.1136/bmjopen-2021-057360 (PMC8860053; doi:10.1136/bmjopen-2021-057360), 2022-02-17
Supplement: bmjopen-2021-057360supp001.pdf [file bmjopen-2021-057360supp001.pdf]

**Appendix 1.** VIF values for all models

| Variables                                                         | Entire Model | Model 1 | Model 2 | Model 3 | Model 4 | Model 5 |
|-------------------------------------------------------------------|--------------|---------|---------|---------|---------|---------|
|                                                                   | VIF          | VIF     | VIF     | VIF     | VIF     | VIF     |
| <b>Age (reference category: 34 and under)</b>                     |              |         |         |         |         |         |
| 35-44                                                             | 1.70         | 1.69    | 3.04    | 1.34    | 1.6     | 1.3     |
| 45-54                                                             | 1.82         | 2.09    | 3.45    | 1.33    | 1.44    | 1.25    |
| 55 +                                                              | 2.68         | 3.16    | 4.3     | 1.51    | 1.73    | 1.56    |
| <b>Gender (reference category: male)</b>                          |              |         |         |         |         |         |
| Female                                                            | 1.38         | 1.24    | 1.42    | 1.44    | 1.35    | 1.16    |
| <b>Marital status (reference category: married)</b>               |              |         |         |         |         |         |
| Never married                                                     | 1.62         | 1.16    | 1.14    | 1.65    | 1.7     | 1.29    |
| Divorced/Spouse died                                              | 1.17         | 1.19    | 1.09    | 1.09    | 1.1     | 1.09    |
| <b>General health status (reference category: very good/good)</b> |              |         |         |         |         |         |
| Moderate                                                          | 1.26         | 1.71    | 1.23    | 1.14    | 1.12    | 1.07    |
| Poor/Very bad                                                     | 1.35         | 1.82    | 1.25    | 1.11    | 1.1     | 1.05    |
| <b>Employment status (reference category: no)</b>                 |              |         |         |         |         |         |
| Yes                                                               | 1.44         | 1.16    | 1.35    | 1.46    | 1.41    | 1.31    |
| <b>Alcohol use (reference category: no)</b>                       |              |         |         |         |         |         |
| Yes                                                               | 1.17         | 1.05    | 1.13    | 1.17    | 1.12    | 1.08    |
| <b>Psycho-social support (reference category: no)</b>             |              |         |         |         |         |         |
| Yes                                                               | 1.03         | 1.01    | 1.04    | 1.04    | 1.05    | 1.03    |
| <b>Tobacco use (reference category: no)</b>                       |              |         |         |         |         |         |
| Yes                                                               | 1.19         | 1.18    | 1.2     | 1.29    | 1.16    | 1.08    |
| <b>Ability to afford treatment (reference category: no)</b>       |              |         |         |         |         |         |
| Yes                                                               | 1.04         | 1.05    | 1.05    | 1.04    | 1.04    | 1.08    |
| <b>Education (reference category: illiterate/unschooled)</b>      |              |         |         |         |         |         |
| Primary school graduates                                          | 2.67         | N/A     | N/A     | N/A     | N/A     | N/A     |
| Primary education graduates                                       | 2.54         | N/A     | N/A     | N/A     | N/A     | N/A     |
| High school graduates                                             | 2.57         | N/A     | N/A     | N/A     | N/A     | N/A     |
| University graduates                                              | 2.61         | N/A     | N/A     | N/A     | N/A     | N/A     |

Model 1: Illiterate/ unschooled, Model 2: Primary school graduates, Model 3: Primary education graduates, Model 4: High school graduates; Model 5: University graduates
